# Supplementary material for: Mediating effect of health consciousness in the relationship of lifestyle and suboptimal health status: a cross-sectional study involving Chinese urban residents
Source: PubMed Central journal article supplement — BMJ Open. 2020 Oct 26;10(10):e039701. doi: 10.1136/bmjopen-2020-039701 (PMC7592276; doi:10.1136/bmjopen-2020-039701), 2020-10-26
Supplement: bmjopen-2020-039701.draft_revisions.pdf [file bmjopen-2020-039701.draft_revisions.pdf]

# BMJ Open

BMJ Open is committed to open peer review. As part of this commitment we make the peer review history of every article we publish publicly available.

When an article is published we post the peer reviewers' comments and the authors' responses online. We also post the versions of the paper that were used during peer review. These are the versions that the peer review comments apply to.

The versions of the paper that follow are the versions that were submitted during the peer review process. They are not the versions of record or the final published versions. They should not be cited or distributed as the published version of this manuscript.

BMJ Open is an open access journal and the full, final, typeset and author-corrected version of record of the manuscript is available on our site with no access controls, subscription charges or pay-per-view fees (<http://bmjopen.bmj.com>).

If you have any questions on BMJ Open's open peer review process please email [info.bmjopen@bmj.com](mailto:info.bmjopen@bmj.com)

# BMJ Open

## Mediating effect of health consciousness in the relationship of lifestyle and sub-health status: A Chinese national cross-sectional study

|                               |                                                                                                                                                                                           |
|-------------------------------|-------------------------------------------------------------------------------------------------------------------------------------------------------------------------------------------|
| Journal:                      | <i>BMJ Open</i>                                                                                                                                                                           |
| Manuscript ID                 | bmjopen-2020-039701                                                                                                                                                                       |
| Article Type:                 | Original research                                                                                                                                                                         |
| Date Submitted by the Author: | 25-Apr-2020                                                                                                                                                                               |
| Complete List of Authors:     | xue, yunlian; Guangdong Provincial People's Hospital, liu, guihao<br>Feng, Yefang<br>Xu, Mengyao<br>Jiang, Lijie<br>Lin, Yuanqi<br>Xu, Jun ; Southern Medical University Nanfang Hospital |
| Keywords:                     | Public health < INFECTIOUS DISEASES, Health policy < HEALTH SERVICES ADMINISTRATION & MANAGEMENT, Risk management < HEALTH SERVICES ADMINISTRATION & MANAGEMENT                           |
|                               |                                                                                                                                                                                           |

SCHOLARONE™  
Manuscripts

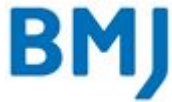

I, the Submitting Author has the right to grant and does grant on behalf of all authors of the Work (as defined in the below author licence), an exclusive licence and/or a non-exclusive licence for contributions from authors who are: i) UK Crown employees; ii) where BMJ has agreed a CC-BY licence shall apply, and/or iii) in accordance with the terms applicable for US Federal Government officers or employees acting as part of their official duties; on a worldwide, perpetual, irrevocable, royalty-free basis to BMJ Publishing Group Ltd ("BMJ") its licensees and where the relevant Journal is co-owned by BMJ to the co-owners of the Journal, to publish the Work in this journal and any other BMJ products and to exploit all rights, as set out in our [licence](#).

The Submitting Author accepts and understands that any supply made under these terms is made by BMJ to the Submitting Author unless you are acting as an employee on behalf of your employer or a postgraduate student of an affiliated institution which is paying any applicable article publishing charge ("APC") for Open Access articles. Where the Submitting Author wishes to make the Work available on an Open Access basis (and intends to pay the relevant APC), the terms of reuse of such Open Access shall be governed by a Creative Commons licence – details of these licences and which [Creative Commons](#) licence will apply to this Work are set out in our licence referred to above.

Other than as permitted in any relevant BMJ Author's Self Archiving Policies, I confirm this Work has not been accepted for publication elsewhere, is not being considered for publication elsewhere and does not duplicate material already published. I confirm all authors consent to publication of this Work and authorise the granting of this licence.

1  
2  
3 Mediating effect of health consciousness in the relationship of lifestyle  
4  
5  
6 and sub-health status: A Chinese national cross-sectional study  
7  
8  
9

10  
11 Yunlian Xue<sup>1,2,3</sup>, Guihao Liu<sup>2</sup>, Yefang Feng<sup>1</sup>, Mengyao Xu<sup>1</sup>, Lijie Jiang<sup>1</sup>, Yuanqi Lin<sup>1</sup>,  
12  
13 Jun Xu<sup>1\*</sup>  
14  
15

16  
17  
18 <sup>1</sup> Department of Sanitation Economy Administration, Nanfang Hospital, Southern  
19  
20 Medical University, Guangzhou, Guangdong Province, PR China  
21  
22

23 <sup>2</sup> Guangdong Provincial People's Hospital (Guangdong Academy of Medical  
24  
25 Sciences), Guangzhou, Guangdong Province, PR China  
26  
27

28 <sup>3</sup> School of Public Health, Southern Medical University, Guangzhou, Guangdong  
29  
30 Province, PR China  
31  
32

33  
34  
35  
36  
37  
38  
39 \* Correspondence: Jun Xu

40  
41 Department of Sanitation Economy Administration, Nanfang Hospital, Southern  
42  
43 Medical University, Guangzhou, Guangdong Province, PR China  
44  
45

46 Email: drugstat@163.com  
47

48 Telephone: +86-020-61641888  
49  
50  
51  
52  
53  
54  
55  
56  
57  
58  
59  
60

### **Strengths and limitations of this study**

Sub health status (SHS) is common in Chinese urban residents, according to this large cross-sectional study of a nationally representative study.

Lifestyle can directly associate with physical SHS, but not with mental SHS and faintly with social SHS, which is firstly be investigated.

Health consciousness shows stronger direct association with physical, mental and social SHS than lifestyle, and takes mediating effect on the relationship of lifestyle with physical, mental and social SHS.

## Abstract

**Objective:** Sub-health status (SHS), a third state between good health and disease, can easily develop into chronic diseases, and can be influenced by lifestyle and health consciousness. No studies have surveyed the intermediation of health consciousness on the relationship of lifestyle with SHS. This study aimed to analyze the association of lifestyle and SHS, and intermediation of health consciousness.

**Design:** A cross-sectional face-to-face survey using a four-stage stratified sampling method.

**Participants:** 3535 Chinese urban residents were investigated. SHS was measured using Sub-Health Measurement Scale V1.0. A structural equation model (SEM) was adopted to analyze relationships among lifestyle, health consciousness, and SHS. We applied a bootstrapping method to estimate the mediation effect of health consciousness.

**Results:** Lifestyle had a strong direct association with physical sub-health ( $\beta=-0.207$ ), faint direct association with social health ( $\beta=-0.075$ ), and no significant direct association with mental sub-health ( $\beta=-0.050$ ). Health consciousness had a strong direct association with physical sub-health ( $\beta=0.480$ ), mental sub-health ( $\beta=0.601$ ), and social sub-health ( $\beta=0.559$ ).

**Conclusions:** Health consciousness was much more important in preventing of physical, mental and social SHS than lifestyle itself, and might be a useful way to change unhealthy lifestyle and reducing the influence of poor lifestyle on physical, mental and social SHS.

**Keywords:** Sub-health status, Lifestyle, Health consciousness, Urban residents, China

## Introduction

In 1946, the World Health Organization (WHO) [1] defined health as “a state of complete physical, mental, and social well-being and not merely the absence of disease or infirmity.” It is reported that NCDs account for an estimated 80% of total deaths and 70% of the total number of disability-adjusted life-years (DALYs) in early twentieth century[2], and increase steadily with the urbanization and aging [3], with more than 88% of total deaths due to NCDs in 2019 in China[4]. A study pointed that NCDs accounted for 18 of the leading 20 causes of age-standardized years lived with disability on a global scale[5]. Preclinical status of CNDs and its early detection have become major issues in the promotion of the basic health service in the reform of health care[6].

Sub-health status (SHS), an intermediate status between chronic disease and health, is believed to be a subclinical, reversible stage of chronic disease[7]. People in SHS, although without a diagnosable condition, is characterized by a decline in vitality and physiological function, ambiguous health complaints, general weakness, and lack of vitality, and it has become a new public health challenge in China[8,9].

SHS has a prevalence of higher than 65% in China[10-13]. and become an increasingly concerned problem in many other countries[14,15]. Moreover, the prevalence may be severely underestimated since many individuals may not know that they suffer from SHS. For instance, in an investigation of 6,000 Chinese self-reported “healthy people”, 72.8% were in “suboptimal health status” [16]. Identifying the influencing factors of SHS is important for preventing SHS, and would provide important information for first-level prevention of CND. In accordance with health definition released by WHO, SHS also contains of three dimensions: physical, mental and social adaption[17].

1  
2  
3 Lifestyle is an important factor associated with SHS, including smoking, alcohol  
4 use, skipping breakfast, poor nutrition, lack of exercise, and sleep problems[18,19]. In  
5 SHS, one can prevent a chronic disease by modifying his or her poor lifestyle. China's  
6 Blue Book on Self-Care[20] also proved this. Although, we ought to change bad  
7 lifestyle when we aware of those bad effects for health, actually this is difficult to  
8 achieve in practice[21,22]. Studies revealed that better knowledge and strong belief  
9 improves adherence to lifestyle changes[23,24], and preventing and controlling of  
10 chronic diseases[25,26]. Better knowledge and strong belief are important expression  
11 of health consciousness. Health consciousness is related with anxiety, stress,  
12 depression, and non-treated diseases[27]. However, to our knowledge, we haven't  
13 found studies about the association of health consciousness and SHS. What's more, a  
14 person may present different sub-health states in physical, mental and social  
15 adaptation, it is necessary to analyze SHS separately. We may want to know, whether  
16 improved health consciousness is associated with better lifestyle and less physical,  
17 mental and social SHS? Is there a mediating effect of health consciousness on the  
18 association of lifestyle with physical, mental and social SHS? This study used  
19 structural equation models to clarify these questions on a basis of a national  
20 representative sample of Chinese urban residents.

## 21 **Methods**

### 22 **Study design and population**

23 A cross-sectional survey using a four-stage stratified sampling method was conducted  
24 from March to September of 2018. 3969 residents age 14 and older who lived in the  
25 urban area more than six months in Guangdong, Heilongjiang and Sichuan provinces  
26 participated in this research. Of these, 389 participants were excluded for confirmed  
27 diseases in the last two months, 43 were excluded for missing values of lifestyle,  
28  
29  
30  
31  
32  
33  
34  
35  
36  
37  
38  
39  
40  
41  
42  
43  
44  
45  
46  
47  
48  
49  
50  
51  
52  
53  
54  
55  
56  
57  
58  
59  
60



1  
2  
3 health consciousness, and SHS items. Finally, 3535 urban residents were analyzed,  
4 and the valid response rate was 89.1%. Every participant was volunteered, provided  
5 verbal consent prior to data collection, and could refuse to participate anytime. They  
6 were also invited to give advices of the questionnaire. This study was approved by  
7 Medical Ethics committee of Nanfang Hospital of Southern medical university (No.  
8 NFEC-2019-196). All data were kept strictly confidential.

### 17 **Patient and Public Involvement**

19 We established a participant Involvement mechanism. Each meeting and discussion  
20 we actively invited some of the participants in the research to discuss items of the  
21 questionnaire. Also, we asked investigators to record all questions that participants  
22 asked and questioned in the investigation. Although we couldn't feedback the SHS to  
23 every respondent for anonymous of this study, the participants and each urban  
24 resident will know their SHS as we established the norm of SHS for urban  
25 residents[28] and methods to prevent SHS by means of findings in this study.

### 35 **Sample size**

37 According to the detecting rate of SHS in Guangdong province[29] (65.5%), we  
38 estimated the sample size of each site of investigation by the sample size formula[30]:

$$n = \frac{\mu_{\alpha}^2 \rho (1 - \rho)}{\delta^2} \quad (1)$$

46 with type I error  $\alpha$  of 0.05, maximum permissible error of 0.03. The sample size of  
47 each site was no less than 965.

### 51 **Survey instrument**

53 A self-designed questionnaire was used for investigation, which was comprised of  
54 four parts: general demographic characteristics, consisting of age, gender, marital  
55 status, highest education level, per capita monthly household income, and insurance;  
56  
57  
58  
59  
60

1  
2  
3 lifestyle(LS), including smoking, bad diet habit, alcohol intake, breakfast  
4 consumption, physical exercise, early to bed (before 11 pm), and sleep time; health  
5 consciousness, (HC) containing health knowledge, care for health, and effect of  
6 leisure promoting health; and sub-health measurement scale (SHMS) V1·0. The  
7 questionnaire was completed by each volunteer within 30 min. Verbal consents were  
8 deemed to be sufficient because the participants had volunteered for the study and  
9 could refuse to take part if they wished. The objective of the survey was to study the  
10 health status rather than to intervene. All data were kept strictly confidential. The  
11 ethics committee also approved the consent procedure.  
12  
13  
14  
15  
16  
17  
18  
19  
20  
21  
22

### 23 **SHS assessment**

24 Sub-health status assessment was performed by SHMS V1·0 which was developed by  
25 our research group. It comprise of 39 items[17], and proved to be high reliability  
26 and validity in a Chinese population [31]. SHMS V1.0 consists of three subscales,  
27 physical sub-health status (PS), mental sub-health status (MS) and social sub-health  
28 status (SS). PS comprises of four factors: physical condition, organ function, body  
29 movement function and vigor out of 14 items. MS comprises of three factors: positive  
30 emotion, psychological symptoms and cognitive function out of 12 items. SS  
31 comprises of three factors: social adjustment, social resources and social support out  
32 of 9 items. For each item, there are five response categories (defined as ‘none’,  
33 ‘occasionally’, ‘sometimes’, ‘constantly’ and ‘always’) corresponding, respectively,  
34 to the frequency of occurrence of each symptom. In the data analysis, ‘none’ was  
35 assigned a score of 1, ‘occasionally’ 2, ‘sometimes’ 3, ‘constantly’ 4 and ‘always’ 5.  
36  
37 Participants were asked about uncomfortable symptoms that they had experienced  
38 during the previous month. The total scores were then calculated. A low total score  
39 represents a low estimate of SHS (ie, poor health).  
40  
41  
42  
43  
44  
45  
46  
47  
48  
49  
50  
51  
52  
53  
54  
55  
56  
57  
58  
59  
60

### **Lifestyle evaluation**

Smoking was comprised of never smoke, quit, smoking with less 20 cigarettes a day, smoking with 20 cigarettes and more a day. Bad diet habit was divided into yes (if any one of the following seven situations exist: irregular eating time, dieting, overeating, dietary bias or pickiness, salty tasty, spicy tasty, and using snacks instead of meals), and no (without any situations exist). Alcohol intake was divided into never, occasionally, little alcohol every day, some alcohol every day, and much alcohol every day. Breakfast consumption, physical exercise and early to bed were all comprised of never, occasionally (one or two days a week), sometimes (three or four days a week), frequently (five or six days a week) and everyday. Sleep time were divided into five groups, <3hours/day, <5hours/day, <7hours/day, <9hours/day, and  $\geq 9$ hours/day.

### **Health consciousness evaluation**

Health knowledge and attention to health consisted of very few/low, few/low, general, much/high and very much/high. Effect of leisure on health consisted of no effect, some effect and very effective.

### **Quality control and Data management**

Investigators of each site were unified trained through face-to-face, video conferencing and telephone. Before the investigation, making sure that purpose and importance of the investigation and verbal informed consent were all detailed informed to the participants. Questionnaires were answered independently by respondents according to their own understanding, and re-answered for those missing data after checking by investigators. Before data coding and data entry, suspicious duplicate questionnaires with a repetition rate higher than 80% and completion rate lower than 80% were excluded. All questionnaire data were double-entered via

1  
2  
3 Epidata 3.1 software. The two data sets were cross compared for validity and errors.  
4

### 5 **Statistical analysis**

6  
7 Description was using means (standard deviations) and proportions. A one-way  
8 ANOVA with LSD multiple comparisons was used for comparisons. Structural  
9 equation modeling (SEM) was used to analyze the complexity of associations between  
10 lifestyle, health consciousness, and SHS. The relative  $\chi^2$  (CMIN/DF), the root  
11 mean-square error of approximation (RMSEA), the comparative fit index (CFI), the  
12 goodness-of-fit index (GFI), and the adjusted goodness-of-fit index (AGFI) were used  
13 to assessing model fit. The bootstrapping method of repeat sampling by 2000 times  
14 was applied to verify statistical significance and calculate the confidence intervals for  
15 the direct, indirect, and total effects. Participants with missing data were deleted from  
16 analysis. All *P*-values were two sided, with values <0.05 considered statistically  
17 significant. IBM SPSS Statistics 20.0 was used for the descriptive analysis. The SEM  
18 analysis was conducted with AMOS (SPSS Statistics version 20.0, SPSS Inc.,  
19 Chicago, IL).  
20  
21  
22  
23  
24  
25  
26  
27  
28  
29  
30  
31  
32  
33  
34  
35  
36  
37

### 38 **Results**

#### 39 **Participants' demographic characteristics**

40  
41 Baseline characteristics of all study participants are presented in Table 1. Of the 3535  
42 participants ,1746 (49.4%) were men and 1789 (50.6%) were women. The mean age  
43 was 38.91±14.23 years. Most of the participants (64.30%) were married. Participants  
44 with per capita monthly household income (RMB) less than 5000 RMB were  
45 1939(54.85%). Participants with compulsory school (through grade 9), high school  
46 graduation, junior college degree, or university or college degree were 847 (23.96%),  
47 764 (21.61%), 803 (22.72%) and 1117 (31.60%), respectively.  
48  
49  
50  
51  
52  
53  
54  
55  
56  
57  
58  
59  
60

#### **Association of lifestyle, health consciousness, and SHS**

1  
2  
3 The mean (SD) of the overall SHS, PS, MS and SS transformed scores were 66.50  
4 (11.99), 70.45 (12.80), 66.62 (14.28), and 60.21 (15.56), respectively. The ANOVA  
5  
6 results showed that various groups of lifestyle and health consciousness differed on  
7  
8 physical SHS, mental SHS, and social SHS, (Table 2). People who never smoked had  
9  
10 the highest physical and social SHS scores; however, participants who quit smoking  
11  
12 had lower physical, mental, and social SHS scores than participants who were still  
13  
14 smoking. People who had bad diet habits and consumed the most alcohol had the  
15  
16 lowest physical, mental, and social SHS scores. Physical, mental, and social SHS  
17  
18 scores were higher for participants who regularly consumed breakfast, engaged in  
19  
20 regular physical exercise, had early bedtimes (i.e., before 11 P.M.), and longer sleep  
21  
22 duration.  
23  
24  
25  
26  
27

### 28 **SEM analysis of lifestyle, health consciousness, and SHS**

29  
30 We analyzed the association of lifestyle, health consciousness, and SHS by using  
31  
32 SEM models (Figure). Three models were fitted reasonably well to the data. As  
33  
34 shown in the figures: (1) all indicator variables that we hypothesized as predictors  
35  
36 were significantly related to their respective latent factors,  $P < 0.001$ ; (2) lifestyle had a  
37  
38 direct negative association with PS ( $\beta: -0.21, P < 0.001$ ) and SS ( $\beta: -0.07, P: 0.019$ ),  
39  
40 but no direct association with MS ( $\beta: -0.05, P: 0.11$ ); (3) health consciousness had  
41  
42 direct positive association with PS ( $\beta: 0.48, P < 0.001$ ), MS ( $\beta: 0.60, P < 0.001$ ), and SS  
43  
44 ( $\beta: 0.56, P < 0.001$ ), and mediating effects on the association of lifestyle with PS, MS  
45  
46 and SS.  
47  
48  
49  
50  
51

52 The association paths of lifestyle and health consciousness on SHS are presented in  
53  
54 Table 3. Although, lifestyle and health consciousness were both associated with SHS,  
55  
56 health consciousness had larger associations with PS ( $\beta: 0.480$ ), MS ( $\beta: 0.601$ ), and  
57  
58 SS ( $\beta: 0.559$ ) than lifestyle ( $\beta: -0.441, -0.352, -0.356$  respectively). Association of  
59  
60

1  
2  
3 lifestyle and PS could be direct ( $\beta$ : -0.207; 95%CI: -0.273 to -0.140)) and indirect ( $\beta$ :  
4 -0.233; 95%CI: -0.291 to -0.187), with larger indirect association than direct  
5  
6 association. However, we only Lifestyle impacted MS only indirectly ( $\beta$ : -0.302;  
7  
8 95%CI: -0.369 to -0.254) though health consciousness. Although lifestyle impacted  
9  
10 SS both directly ( $\beta$ : -0.075; 95%CI: -0.137 to -0.008) and indirectly ( $\beta$ : -0.281;  
11  
12 95%CI: -0.340 to -0.235), the direct impact was weak.

## 17 Discussion

18  
19  
20 In this large cross-sectional study of a nationally representative sample, we found that  
21  
22 lifestyle health consciousness showed significantly mediating effects on the  
23  
24 association of lifestyle with PS, MS and SS. The direct association of PS, MS and SS  
25  
26 with health consciousness were all significantly higher than with lifestyle. However,  
27  
28 lifestyle only associated with PS moderately and SS faintly. No significant association  
29  
30 was found between lifestyle and MS.  
31  
32

33  
34 SHS is a subjective feeling and lacks objective clinical diagnostics, and  
35  
36 self-assessed by questionnaire as the most appropriate method. SHMS V1.0 is a  
37  
38 multidimensional scale that includes physical, mental, and social dimensions that  
39  
40 correspond to the WHO's more comprehensive definition of health [32], and is widely  
41  
42 used in China for assessing of SHS in urban residents, workers and  
43  
44 students[10,11,17,19]. We found that Chinese residents had low score in PS, MS  
45  
46 and SS, which means high risk of SHS in physical, mental and social adaption.  
47  
48

49  
50 To the best of our knowledge, this is the first national representative analyzation of  
51  
52 the mediating effect of health consciousness on the association of lifestyle with  
53  
54 physical, mental and social SHS. All variables included in lifestyle and health  
55  
56 consciousness were significantly associated with lifestyle and health consciousness.  
57  
58 Urban residents with unhealthy lifestyle, such as smoking, alcohol intake, bad diet  
59  
60

1  
2  
3 habits, irregular breakfast consumption, less physical exercises, less frequent early to  
4 bed, and short of sleep time were more likely to get into PS, MS and SS. A study  
5 [32]revealed that breakfast eating habits are significantly associated with lifestyle  
6 and appear to be a useful predictor of a healthy lifestyle. People who skip breakfast  
7 are prone to unhealthy behaviors, such as limited exercise [33]. Insufficient sleep is  
8 associated with several health-risk behaviors[34], such as not meeting physical  
9 activity recommendations[35], using cigarettes and alcohol, and feeling sad or  
10 hopeless[36]. A poor diet was the third greatest influencing factor for physical and  
11 social health in this study, which was in line with previous studies[37,38].

12  
13  
14  
15  
16  
17  
18  
19  
20  
21  
22  
23  
24 This study firstly investigated significant associations of health consciousness with  
25 PS, MS and SS, which were relatively larger than those of lifestyle. Health  
26 consciousness, in this study, included three factors of health knowledge, attention to  
27 health, and effect of leisure on health. As the internal power of healthy behavior,  
28 health consciousness is the most important and fundamental reason to promote health.  
29 One who had more health knowledge believed they had control over their health[39].

30  
31  
32  
33  
34  
35  
36  
37  
38 The most important finding was that health consciousness played mediating effect  
39 in the relationship of lifestyle with physical, mental and social SHS. Studies have  
40 shown health consciousness is correlated with health behavior, information seeking  
41 and health coping[40]. Modify attitudes are effective for promoting health behavior  
42 change[41]. Already-health conscious are attentive to health warnings about the risks  
43 of unhealthy lifestyle, such as alcohol consumption[42].

## 51 **Conclusions**

52  
53  
54 In this large representative cross-sectional study of Chinese urban residents, we  
55 found that associations of physical, mental and social SHS with health consciousness  
56 were all much stronger than those of lifestyle. Lifestyle showed no direct association  
57  
58  
59  
60

1  
2  
3 with mental SHS, and only faintly direct association with social SHS. What's more,  
4 health consciousness played mediating effect in the relationship of lifestyle with  
5 physical, mental and social SHS. Health consciousness was much more important in  
6 preventing of physical, mental and social SHS than lifestyle itself, and might be a  
7 useful way to change unhealthy lifestyle and reducing the influence of poor lifestyle  
8 on physical, mental and social SHS.  
9

### 17 **Limitations**

19 There are still some limitations in this study. First, although this is a face-to-face  
20 interview, all data were collected from a respondent-completed questionnaire,  
21 responses may comprise a level of inherent inaccuracy or bias. Second, although this  
22 survey used a four-stage stratified sampling method to minimize sampling error, it is  
23 inevitable. Moreover, this study couldn't include all but only seven most common  
24 lifestyle factors.  
25  
26  
27  
28  
29  
30  
31  
32  
33  
34

35 **Contributors** XJ developed the questionnaire and study design, supervised the  
36 analysis and contributed to the final version of the manuscript. XYL did the analyses  
37 and wrote the first draft. LGH, FYF, XMY, LYQ and JLJ were in charge of the  
38 investigation. All authors contributed to and read the final draft of the manuscript.  
39  
40  
41  
42  
43  
44

45 **Competing interests** No declared

46 **Patient consent for publication** Not required

47  
48  
49 **Ethics approval** Ethics approval to collect the patients' data was obtained from the  
50 Ethics Committee of the NanFang Hospital of Southern Medical University  
51 (NFEC-2019-196).  
52  
53  
54

55 **Funding** This research was supported by the National Natural Science Fund, National  
56 Natural Science Foundation of China (No: 71673126), and the Science and  
57  
58  
59  
60



1  
2  
3 Technology Planning Project of Guangzhou City of China (No: 201803010089).

4  
5 **Role of the funding source** The sponsors of the study had no role in the study design,  
6  
7 data collection, data analysis, or data interpretation. The corresponding author had full  
8  
9 access to all the data in the study and had final responsibility for the decision to  
10  
11 submit for publication.  
12  
13

#### 14 **Acknowledgments**

15  
16  
17 The authors thank all study participants. We also thank the investigators and students  
18  
19 for their assistance in this research.  
20  
21  
22  
23  
24  
25  
26

#### 27 **References**

- 28  
29 1 World Health Organization: What is the WHO definition of health? World Health  
30  
31 Organization. <http://www.who.int/suggestions/faq/en/>. Accessed 23 Mar 2020.
- 32  
33 2 Strong K, Mathers C, Leeder S, Beaglehole R. Preventing chronic diseases: how  
34  
35 many lives can we save? *Lancet*. 2005;366:1578–82
- 36  
37 3 Wang L, Kong LZ, Wu F, Bai YM, Burton R. Preventing chronic diseases in  
38  
39 China. *Lancet*. 2005;366:1821–4.
- 40  
41 4 Transcript of press conference of the office of Health China action Promotion  
42  
43 Committee on July 31, 2019.  
44  
45 [http://www.nhc.gov.cn/xcs/s7847/201907/0d95adec49f84810a6d45a0a1e997d67.](http://www.nhc.gov.cn/xcs/s7847/201907/0d95adec49f84810a6d45a0a1e997d67.shtml)  
46  
47 shtml
- 48  
49 5 GBD 2015 Mortality and Causes of Death Collaborators. Global, regional, and  
50  
51 national life expectancy, all-cause mortality, and cause-specific mortality for 249  
52  
53 causes of death, 1980-2015: a systematic analysis for the Global Burden of  
54  
55 Disease Study 2015. *Lancet*. 2016;388(10053):1459-1544.
- 56  
57 6 Wang Y, Ge S, Yan Y, Wang A, Zhao Z, Yu X, *et al*, Fang H., *et al*. China  
58  
59 suboptimal health cohort study: Rationale, design and baseline characteristics. *J.*  
60  
61 *Transl. Med*. 2016;14:291–302.
- 62  
63 7 Wei Wang. Suboptimal health: a potential preventive instrument for

- 1  
2  
3 non-communicable disease control and management. *Journal of Translational*  
4 *Medicine*, 2012, 10(2):A45.
- 5  
6  
7 8 Yan YX, Liu YQ, Li M, Hu PF, Guo AM, Yang XH, Qiu JJ, Yang SS, Wang W:  
8 Development and evaluation of a questionnaire for measuring suboptimal health  
9 status in urban Chinese. *Journal of Epidemiology* 2009,  
10 doi:10.2188/jea.JE20080086.
- 11  
12  
13 9 Yan YX, Do J, Liu YQ, Yang XH, Li M, Xia G, Wang W: Association of  
14 suboptimal health status and cardiovascular risk factors in urban Chinese workers.  
15 *Journal of Urban Health* 2012, doi10.1007/s11524-011- 9636-8
- 16  
17  
18 10 Xue YL, Xu J, Liu GH, Feng Y, Xu M, Xie J, et al. Study of association between  
19 personality and sub-health status among urban residents aged more than 14 years  
20 old in 4 cities in China. *J Southern Med Univ*. 2019,39(4): 443-449.
- 21  
22  
23 11 Xue YL, Xu J, Liu GH, Feng Y, Xu M, Xie J, et al. The mediating effect of  
24 adversity quotient on the correlation between stressful life events and sub-health  
25 status. *Modern Preventive Medicine*. 2019,46(1):82-85,90.
- 26  
27  
28 12 Sun X, Wei M, Zhu C, Wang XL, Zhao XS, Luo R. The epidemiological  
29 investigation of sub-health status in Guangdong. *Shandong Med J*. 2008;  
30 48:59-60
- 31  
32  
33 13 Xie J, Luo HB, Zhu H, Chang WJ, Xu J. Prevalence and influence factors of  
34 sub-health status among urban residents in Tianjin. *Chin J Public Health*. 2016;  
35 32: 76-80.
- 36  
37  
38 14 Sou J, Goldenberg S M, Duff P, Nguyen P, Shoveller J, Shannon K. Recent  
39 im/migration to Canada linked to unmet health needs among sex workers in  
40 Vancouver, Canada: Findings of a longitudinal study. *Issues in Health Care of*  
41 *Women*. 2017; 38(5):492-506.
- 42  
43  
44 15 Dunstan RH, Sparkes DL, Roberts TK, Crompton MJ, Gottfries J, Dascombe BJ.  
45 Development of a complex amino acid supplement, Fatigue Reviva, for oral  
46 ingestion: initial evaluations of product concept and impact on symptoms of  
47 suboptimal health in a group of males. *Nutrition Journal*. 2013; 12:115.
- 48  
49  
50 16 Liu Z, Li M. The third state and psychosomatic medicine research. *Med*  
51 *Philosophy*. 2001;22(1):36-8.
- 52  
53  
54 17 Bi JL, Huang Y, Xiao Y, Cheng JR, Li F, Wang T, *et al*. Association of lifestyle  
55 factors and suboptimal health status: a cross sectional study of Chinese students.  
56  
57  
58  
59  
60

- 1  
2  
3 BMJ Open 2014;4: e005156.  
4  
5 18 Lolokote S, Hidru TH, Li X. Do socio-cultural factors influence college students'  
6 self-rated health status and health-promoting lifestyle behaviors? A  
7 cross-sectional multicenter study in Dalian, China. *BMC Public Health*. 2017; 17:  
8 478.  
9  
10  
11  
12 19 Chen J, Xiang H, Jiang P, Yu L, Jing Y, Li F, *et al*. The role of healthy lifestyle  
13 behaviors in the implementation of regressing suboptimal health status among  
14 college students in China: A nested case-control study. *Int J Environ Res Public*  
15 *Health*. 2017; 14: 240.  
16  
17  
18 20 Ping Xie. Blue Book of Investment: Annual Report on The Development of  
19 China's Investment (2015). *Soc Science Acad Press*. 2015.  
20  
21 21 Siripitayakunkit A, Hanucharurnkul S, Gail D' Eramo Melkus, *et al*. Factors  
22 Contributing to Integrating Lifestyle in Thai Women with Type 2 Diabetes.  
23 hanucharurnkul s, 2010.  
24  
25  
26 22 Barclay C, Procter KL, Glendenning R, Marsh P, Freeman J, Mathers N. Can  
27 type 2 diabetes be prevented in UK general practice? A lifestyle-change  
28 feasibility study (ISAIAH). *British Journal of General Practice*, 2008,  
29 58(553):541-547.  
30  
31  
32 23 Alm-Roijer C, Stagmo M, Uden G, Erhardt L. Better knowledge improves  
33 adherence to lifestyle changes and medication in patients with coronary heart  
34 disease. *European Journal of Cardiovascular Nursing*, 2004, 3(4):321-330.  
35  
36  
37 24 Jasmine TJX, Wai-Chi SC, Hegney DG. The impact of knowledge and beliefs on  
38 adherence to cardiac rehabilitation programs in patients with heart failure: A  
39 systematic review. *Jbi Database of Systematic Reviews & Implementation*  
40 *Reports*, 2012, 10(7):399-470.  
41  
42  
43 25 Kitson A, Brook A, Harvey G, Jordan Z, Marshall R, O'Shea R, *et al*. Using  
44 Complexity and Network Concepts to Inform Healthcare Knowledge Translation.  
45 *Int J Health Policy Manag*. 2017; 7: 231.  
46  
47  
48 26 Gazmararian JA, Williams MV, Peel J, Baker DW. Health Literacy and  
49 Knowledge of Chronic Disease. *Patient Education and Counseling*, 2003,  
50 51(3):267-275.  
51  
52  
53 27 Dumitrescu AL, Kawamura M, Dogaru B, Dogaru C. Investigating the  
54 relationship between self-reported oral health status, oral health-related  
55 behaviours and self-consciousness in Romania. *oral health & preventive dentistry*,  
56  
57  
58  
59  
60

- 2008, 6(2):95.
- 28 Xu J, Xue YL, Liu GH, Feng YF, Xu MY, Xie J, *et al.* Establishment of the norms of Sub-Health Measurement Scale Version 1.0 for Chinese urban residents. *J Southern Med Univ.* 2019,39(3): 271-278.
- 29 Lu Y. Sub-health status and influencing factors of urban residents in Guangdong Province. Southern medical university. 2013.
- 30 Wang JH. Epidemiology. Beijing: People's Medical Publishing House. 2014: Chinese.
- 31 Lu Y, Xu J, Cai YJ, Xie J, Qiu JC, Wei Q. Reliability and Validity of SHS Measurement Scale Version 1.0 for Measuring the SHS of Urban Residents in Three Districts. *China Journal of Health Psychology.* 2013;21(5):707–8.
- 32 Chen JY, Cheng JR, Liu YY, Tang Y, Sun XM, Wang T, *et al.* Associations between breakfast eating habits and health-promoting lifestyle behaviors, suboptimal health status in Southern China: A population based, cross sectional study. *J Transl Med.* 2014; 12: 348.
- 33 Keskirahkonen A, Kaprio J, Rissanen A, Virkkunen M, Rose RJ. Breakfast skipping and health-compromising behaviors in adolescents and adults. *Eur J Clin Nutr.* 2003; 57: 842–853.
- 34 Ma C, Xu W, Zhou L, Ma S, Wang Y. Association between lifestyle behaviors and suboptimal health status among Chinese college freshmen: A cross-sectional study. *BMC Public Health.* 2018; 18: 105.
- 35 Stea TH, Knutsen T, Torstveit MK. Association between short time in bed, health-risk behaviors and poor academic achievement among Norwegian adolescents. *Sleep Medicine.* 2014; 15: 666–71.
- 36 Zahra J, Ford T, Jodrell D. Cross-sectional survey of daily junk food consumption, irregular eating, mental and physical health and parenting style of British secondary school children. *Child Care Hlth Dev.* 2014; 40: 481.
- 37 Nielsen M B, Gjerstad J, Frone M. Alcohol use among Norwegian workers: Associations with health and well-being. *Occup Med.* 2018; 68: 96–8.
- 38 Steele J, Lisher J, Skivington M, Dunn C, Arnold J, Tew G, *et al.* A higher effort-based paradigm in physical activity and exercise for public health: Making the case for a greater emphasis on resistance training. *BMC Public Health.* 2017; 17: 300.
- 39 Zhubing S, Zhenyi W. A correlation research of university students' lifestyle

- 1  
2  
3 behaviors and psychological sub-health in Guizhou. *Journal of Nanjing Sport*  
4 *Institute(Natural Science)*. 2014; 13: 155–60.  
5  
6  
7 40 Hovick S, Nevarez L, Lloyd S, Garcia-Prieto C, Enard K, Jones L, et al. An  
8 examination of health consciousness and its' link to health behavior[C]// 140st  
9 APHA Annual Meeting and Exposition 2012. 2012.  
10  
11  
12 41 Sheeran P, Maki A, Montanaro E, Avishai-Yitshak A, Bryan A, Klein WMP, *et*  
13 *al.* The impact of changing attitudes, norms, and self-efficacy on health-related  
14 intentions and behavior: A meta-analysis. *Pers Psychol*. 2016; 66: 1178–88.  
15  
16  
17 42 Kaskutas L A , Greenfield T K . The Role of Health Consciousness in Predicting  
18 Attention to Health Warning Messages. *American Journal of Health Promotion*,  
19 1997, 11(3):186-193.  
20  
21  
22  
23  
24  
25  
26  
27  
28  
29  
30  
31  
32  
33  
34  
35  
36  
37  
38  
39  
40  
41  
42  
43  
44  
45  
46  
47  
48  
49  
50  
51  
52  
53  
54  
55  
56  
57  
58  
59  
60

**Table 1 Participant's demographic characteristics (n=3535)**

| Characteristic                            | <i>N</i> | %     |
|-------------------------------------------|----------|-------|
| Gender                                    |          |       |
| Man                                       | 1746     | 49.39 |
| Woman                                     | 1789     | 50.61 |
| Age                                       |          |       |
| 14-24                                     | 637      | 18.02 |
| 25-34                                     | 791      | 22.38 |
| 35-44                                     | 915      | 25.88 |
| 45-54                                     | 720      | 20.37 |
| ≥55                                       | 460      | 13.01 |
| Information missing                       | 12       | 0.34  |
| Married status                            |          |       |
| Unmarried                                 | 1049     | 29.67 |
| Married                                   | 2273     | 64.30 |
| Divorced                                  | 108      | 3.06  |
| Widowed                                   | 82       | 2.32  |
| Information missing                       | 23       | 0.65  |
| Per capita monthly household income (RMB) |          |       |
| <5000                                     | 1939     | 54.85 |
| ≥5000                                     | 1561     | 44.16 |
| Information missing                       | 35       | 0.99  |
| Highest education level                   |          |       |
| Compulsory school (through grade 9)       | 847      | 23.96 |
| High school graduation                    | 764      | 21.61 |
| Junior college degree                     | 803      | 22.72 |
| University/college degree                 | 1117     | 31.60 |
| Information missing                       | 4        | 0.11  |

**Table 2 Group comparisons of lifestyle, health consciousness, and SHS**

| Variates                     | <i>N</i> | PS<br>Mean(SE)                          | MS<br>Mean(SE)                         | SS<br>Mean(SE)                          |
|------------------------------|----------|-----------------------------------------|----------------------------------------|-----------------------------------------|
| <b>Smoking</b>               |          |                                         |                                        |                                         |
| Never                        | 2333     | 71·12(12·52) <sup>#</sup>               | 66·74(14·12) <sup>#</sup>              | 60·96(15·28) <sup>#</sup>               |
| Quit                         | 409      | 67·1(13·59) <sup>* ^</sup>              | 64·46(14·84) <sup>* ^</sup>            | 55·98(16·59)<br><sup>* ^ \$</sup>       |
| <20 cigarettes<br>/day       | 700      | 70·29(12·89) <sup>#</sup>               | 67·37(14·41) <sup>#</sup>              | 60·17(15·33) <sup>#</sup>               |
| ≥ 20 cigarettes<br>/day      | 93       | 69·45(13·11)                            | 67·36(14·15)                           | 60·48(16·95) <sup>#</sup>               |
| <b>Bad diet habits</b>       |          |                                         |                                        |                                         |
| No                           | 1896     | 72·89(12·75) <sup>*</sup>               | 69·75(13·88) <sup>*</sup>              | 62·93(14·77) <sup>*</sup>               |
| Yes                          | 1639     | 67·62(12·27)                            | 63(13·88)                              | 57·06(15·86)                            |
| <b>Alcohol intake</b>        |          |                                         |                                        |                                         |
| Never                        | 1116     | 71·31(13·46)<br><sup>^ \$ &amp;</sup>   | 67·3(14·37) <sup>^ &amp;</sup>         | 61·04(16·2) <sup>^ &amp;</sup>          |
| Occasionally                 | 1988     | 70·65(12·05) <sup>^ &amp;</sup>         | 66·69(13·92) <sup>^ &amp;</sup>        | 60·18(14·85) <sup>&amp;</sup>           |
| Little everyday              | 297      | 67·53(14) <sup>* #</sup>                | 64·86(15·81) <sup>* #</sup>            | 58·69(16·74)<br><sup>* &amp;</sup>      |
| Some everyday                | 83       | 68·2(12·89) <sup>*</sup>                | 65·44(14·05)                           | 59·27(14·39) <sup>&amp;</sup>           |
| Much everyday                | 51       | 63·97(14·59) <sup>* #</sup>             | 61·27(15·83) <sup>* #</sup>            | 53·54(20·67)<br><sup>* # \$</sup>       |
| <b>Breakfast consumption</b> |          |                                         |                                        |                                         |
| Never                        | 103      | 67·23(15·7) <sup>\$ &amp;</sup>         | 62·62(15·65) <sup>\$ &amp;</sup>       | 53·34(18·32)<br><sup>\$ &amp;</sup>     |
| Occasionally                 | 419      | 66·54(12·8) <sup>\$ &amp;</sup>         | 62·43(13·83) <sup>\$ &amp;</sup>       | 54·06(16·59)<br><sup>\$ &amp;</sup>     |
| Sometimes                    | 601      | 67·57(12·19) <sup>\$ &amp;</sup>        | 62·15(13·02) <sup>\$ &amp;</sup>       | 55·8(15·29) <sup>\$ &amp;</sup>         |
| Frequently                   | 865      | 70·66(11·65)<br><sup>* # ^ &amp;</sup>  | 66·46(13·25)<br><sup>* # ^ &amp;</sup> | 60·61(14·21)<br><sup>* # ^ &amp;</sup>  |
| Everyday                     | 1547     | 72·72(12·93)<br><sup>* # ^ \$</sup>     | 69·85(14·51)<br><sup>* # ^ \$</sup>    | 63·82(14·82)<br><sup>* # ^ \$</sup>     |
| <b>Physical exercise</b>     |          |                                         |                                        |                                         |
| Never                        | 567      | 68·38(13·51)<br><sup># ^ \$ &amp;</sup> | 64·6(14·37) <sup>^ \$ &amp;</sup>      | 57·82(15·77)<br><sup># ^ \$ &amp;</sup> |
| Occasionally                 | 1453     | 70·4(11·86) <sup>* &amp;</sup>          | 65·81(13·81) <sup>\$ &amp;</sup>       | 59·5(14·55) <sup>* \$ &amp;</sup>       |
| Sometimes                    | 857      | 70·46(13·19) <sup>* &amp;</sup>         | 66·8(14·12) <sup>* \$ &amp;</sup>      | 59·89(16·68)<br><sup>* \$ &amp;</sup>   |
| Frequently                   | 358      | 71·87(13·81) <sup>*</sup>               | 69·19(14·99) <sup>* # ^</sup>          | 63·97(15·18)<br><sup>* # ^</sup>        |
| Everyday                     | 300      | 72·86(12·83) <sup>* # ^</sup>           | 70·78(14·77) <sup>* # ^</sup>          | 64·6(15·6) <sup>* # ^</sup>             |
| <b>Early to bed</b>          |          |                                         |                                        |                                         |
| Never                        | 514      | 70·79(13·2)                             | 65·95(14·73) <sup>&amp;</sup>          | 59·05(15·95)                            |

|                                    |                |      |                                  |                                  |                                   |
|------------------------------------|----------------|------|----------------------------------|----------------------------------|-----------------------------------|
|                                    |                |      |                                  |                                  | \$&                               |
|                                    | Occasionally   | 1012 | 70·24(11·86) <sup>&amp;</sup>    | 65·64(13·74) <sup>\$&amp;</sup>  | 59·41(15·66) <sup>\$&amp;</sup>   |
|                                    | Sometimes      | 853  | 69·8(12·76) <sup>&amp;</sup>     | 65·23(14·36) <sup>\$&amp;</sup>  | 59·18(15·89) <sup>\$&amp;</sup>   |
|                                    | Frequently     | 587  | 70·17(12·91) <sup>&amp;</sup>    | 67·47(13·66) <sup>#^&amp;</sup>  | 61·16(14·09) <sup>*#^&amp;</sup>  |
|                                    | Everyday       | 569  | 71·76(13·88) <sup>#^\$</sup>     | 70·17(14·73) <sup>*#^\$</sup>    | 63·24(15·6) <sup>*#^\$</sup>      |
| Sleep time                         |                |      |                                  |                                  |                                   |
|                                    | <3hours/day    | 22   | 56·33(11) <sup>^\$&amp;</sup>    | 56·53(10·29) <sup>^\$&amp;</sup> | 46·09(14·79) <sup>^\$&amp;</sup>  |
|                                    | <5hours/day    | 108  | 61·14(13·13) <sup>^\$&amp;</sup> | 56·21(14·34) <sup>^\$&amp;</sup> | 45·32(18·62) <sup>^\$&amp;</sup>  |
|                                    | <7hours/day    | 811  | 66·83(12·35) <sup>*#&amp;</sup>  | 63·86(13·58) <sup>*#&amp;</sup>  | 57·68(15·63) <sup>*#&amp;</sup>   |
|                                    | <9hours/day    | 2278 | 72·16(12·24) <sup>*#^</sup>      | 67·95(14·12) <sup>*#^</sup>      | 61·77(14·64) <sup>*#^</sup>       |
|                                    | ≥9hours/day    | 316  | 71·56(14·01) <sup>*#^</sup>      | 68·35(14·71) <sup>*#^</sup>      | 61·52(16·76) <sup>*#^</sup>       |
| Health knowledge                   |                |      |                                  |                                  |                                   |
|                                    | Very few       | 930  | 70·43(12·73) <sup>\$</sup>       | 65·29(14·71) <sup>^\$&amp;</sup> | 57·47(15·3) <sup>#^\$&amp;</sup>  |
|                                    | Few            | 1138 | 69·83(12·69) <sup>\$&amp;</sup>  | 65·34(13·79) <sup>^\$&amp;</sup> | 58·99(15·26) <sup>*^\$&amp;</sup> |
|                                    | General        | 1074 | 70·05(12·73) <sup>\$</sup>       | 67·14(14·16) <sup>*#&amp;</sup>  | 61·15(15·46) <sup>*#&amp;</sup>   |
|                                    | Much           | 331  | 73·39(12·47) <sup>*#^</sup>      | 71·41(13·53) <sup>*#^&amp;</sup> | 67·25(14·03) <sup>*#^</sup>       |
|                                    | Very much      | 62   | 73·16(16·12) <sup>#</sup>        | 75·57(13·87) <sup>*#^\$</sup>    | 69·94(18·31) <sup>*#^</sup>       |
| Care for health                    |                |      |                                  |                                  |                                   |
|                                    | Very low       | 205  | 67·22(14·81) <sup>^\$&amp;</sup> | 60·62(16·92) <sup>^\$&amp;</sup> | 53·5(17·64) <sup>^\$&amp;</sup>   |
|                                    | Low            | 551  | 67·33(13·52) <sup>^\$&amp;</sup> | 61·99(14·54) <sup>^\$&amp;</sup> | 54·67(16·65) <sup>^\$&amp;</sup>  |
|                                    | General        | 1566 | 69·46(11·97) <sup>*#&amp;</sup>  | 65·44(13·34) <sup>*#&amp;</sup>  | 58·91(14·56) <sup>*#&amp;</sup>   |
|                                    | High           | 971  | 72·94(12·16) <sup>*#^&amp;</sup> | 70·05(13·18) <sup>*#^&amp;</sup> | 64·67(13·95) <sup>*#^&amp;</sup>  |
|                                    | Very high      | 242  | 76·64(13·15) <sup>*#^\$</sup>    | 76·15(13·55) <sup>*#^\$</sup>    | 69·05(14·77) <sup>*#^\$</sup>     |
| Effect of leisure promoting health |                |      |                                  |                                  |                                   |
|                                    | No effect      | 437  | 63·89(12·89) <sup>#^</sup>       | 59·2(14·43) <sup>#^</sup>        | 50·59(16·77) <sup>#^</sup>        |
|                                    | Some effect    | 2463 | 70·17(12·18) <sup>*^</sup>       | 66·27(13·54) <sup>*^</sup>       | 60·09(14·44) <sup>*^</sup>        |
|                                    | Very effective | 635  | 76·04(12·7) <sup>*#</sup>        | 73·1(14·18) <sup>*#</sup>        | 67·31(15·27) <sup>*#</sup>        |

Transformed scores were analyzed here. Statistical analysis included a one-way ANOVA followed by LSD multiple comparisons test. \*= $P<0\cdot05$  as compared to answer code 1; #= $P<0\cdot05$  as compared to answer code 2; ^= $P<0\cdot05$  as compared to



answer code 3;  $\$=P<0.05$  as compared to answer code 4,  $\&=P<0.05$  as compared to answer code 5.

**Table 3 Influencing path of lifestyle and health consciousness on SHS**

| SHS | Path way           | Mean standardized effects | 95%CI       |             | P-value |
|-----|--------------------|---------------------------|-------------|-------------|---------|
|     |                    |                           | lower bound | upper bound |         |
| PS  |                    |                           |             |             |         |
|     | LS—PS(total)       | -0.441                    | -0.488      | -0.395      | <0.001  |
|     | LS—PS(direct)      | -0.207                    | -0.273      | -0.140      | <0.001  |
|     | LS—HC—PH(indirect) | -0.233                    | -0.291      | -0.187      | <0.001  |
|     | HC—PS              | 0.480                     | 0.402       | 0.561       | <0.001  |
| MS  |                    |                           |             |             |         |
|     | LS—MS(total)       | -0.352                    | -0.396      | -0.307      | <0.001  |
|     | LS—MS(direct)      | -0.050                    | -0.113      | 0.021       | 0.158   |
|     | LS—HC—MS(indirect) | -0.302                    | -0.369      | -0.254      | <0.001  |
|     | HC—MS              | 0.601                     | 0.527       | 0.679       | <0.001  |
| SS  |                    |                           |             |             |         |
|     | LS—SS(total)       | -0.356                    | -0.398      | -0.312      | <0.001  |
|     | LS—SS(direct)      | -0.075                    | -0.137      | -0.008      | 0.029   |
|     | LS—HC—SS(indirect) | -0.281                    | -0.340      | -0.235      | <0.001  |
|     | HC—SS              | 0.559                     | 0.491       | 0.635       | <0.001  |

LS=lifestyle behaviors, HC=health consciousness, PS=physical sub-health status, MS=mental sub-health status, SS=social sub-health status

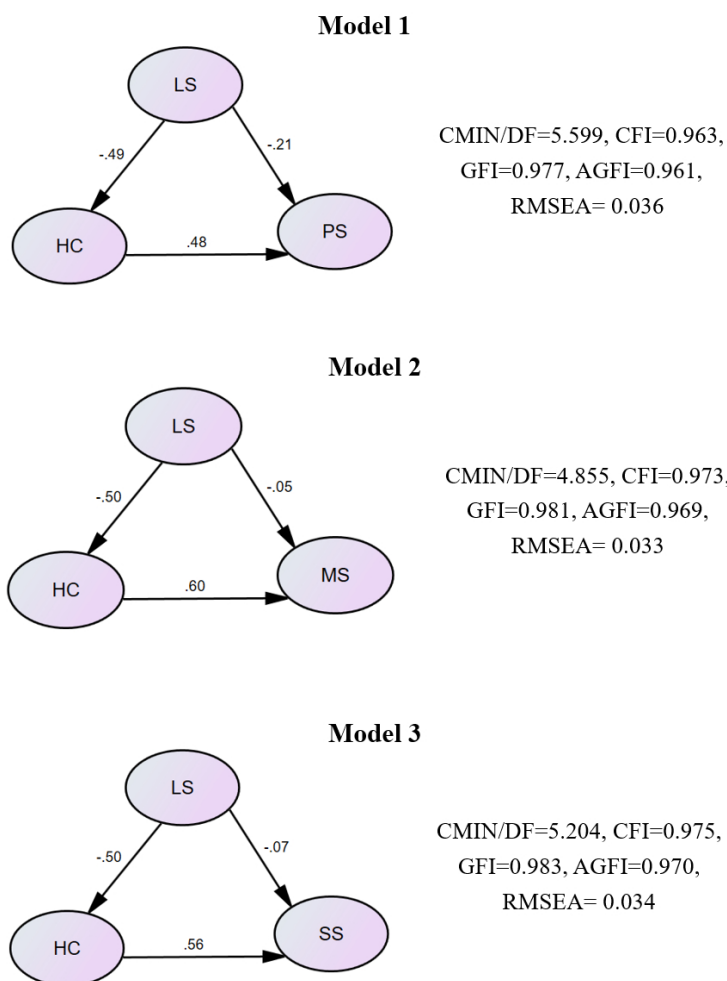

39  
40  
41  
42  
43  
44  
45  
46  
47  
48  
49  
50  
51  
52  
53  
54  
55  
56  
57  
58  
59  
60

**Figure.** SEM model of lifestyle, health consciousness and PS (Model 1), MS (Model 2), or SS (Model 3). All the standardized regression coefficients are presented as single-headed arrows, and statistically significant at 0.05 significance level, except for path of LS to MS. Abbreviations: PS, physical sub-health status, MS, mental sub-health status, SS, social sub-health status.

STROBE Statement—Checklist of items that should be included in reports of *cross-sectional studies*

|                              | Item No | Recommendation                                                                                                                                                                                    | Page No        |
|------------------------------|---------|---------------------------------------------------------------------------------------------------------------------------------------------------------------------------------------------------|----------------|
| <b>Title and abstract</b>    | 1       | (a) Indicate the study's design with a commonly used term in the title or the abstract                                                                                                            | 1              |
|                              |         | (b) Provide in the abstract an informative and balanced summary of what was done and what was found                                                                                               | 3              |
| <b>Introduction</b>          |         |                                                                                                                                                                                                   |                |
| Background/rationale         | 2       | Explain the scientific background and rationale for the investigation being reported                                                                                                              | 4-5            |
| Objectives                   | 3       | State specific objectives, including any prespecified hypotheses                                                                                                                                  | 5              |
| <b>Methods</b>               |         |                                                                                                                                                                                                   |                |
| Study design                 | 4       | Present key elements of study design early in the paper                                                                                                                                           | 5              |
| Setting                      | 5       | Describe the setting, locations, and relevant dates, including periods of recruitment, exposure, follow-up, and data collection                                                                   | 5              |
| Participants                 | 6       | (a) Give the eligibility criteria, and the sources and methods of selection of participants                                                                                                       | 5              |
| Variables                    | 7       | Clearly define all outcomes, exposures, predictors, potential confounders, and effect modifiers. Give diagnostic criteria, if applicable                                                          | 6-7            |
| Data sources/<br>measurement | 8*      | For each variable of interest, give sources of data and details of methods of assessment (measurement). Describe comparability of assessment methods if there is more than one group              | 6-7            |
| Bias                         | 9       | Describe any efforts to address potential sources of bias                                                                                                                                         | 8              |
| Study size                   | 10      | Explain how the study size was arrived at                                                                                                                                                         | 6              |
| Quantitative variables       | 11      | Explain how quantitative variables were handled in the analyses. If applicable, describe which groupings were chosen and why                                                                      | 7-8            |
| Statistical methods          | 12      | (a) Describe all statistical methods, including those used to control for confounding                                                                                                             | 8-9            |
|                              |         | (b) Describe any methods used to examine subgroups and interactions                                                                                                                               | Not applicable |
|                              |         | (c) Explain how missing data were addressed                                                                                                                                                       | 9              |
|                              |         | (d) If applicable, describe analytical methods taking account of sampling strategy                                                                                                                | Not applicable |
|                              |         | (e) Describe any sensitivity analyses                                                                                                                                                             | Not applicable |
| <b>Results</b>               |         |                                                                                                                                                                                                   |                |
| Participants                 | 13*     | (a) Report numbers of individuals at each stage of study—eg numbers potentially eligible, examined for eligibility, confirmed eligible, included in the study, completing follow-up, and analysed | 9              |
|                              |         | (b) Give reasons for non-participation at each stage                                                                                                                                              | Not applicable |
|                              |         | (c) Consider use of a flow diagram                                                                                                                                                                | Not applicable |
| Descriptive data             | 14*     | (a) Give characteristics of study participants (eg demographic, clinical, social) and information on exposures and potential confounders                                                          | 9              |

|                          |     |                                                                                                                                                                                                              |                |                |
|--------------------------|-----|--------------------------------------------------------------------------------------------------------------------------------------------------------------------------------------------------------------|----------------|----------------|
|                          |     | (b) Indicate number of participants with missing data for each variable of interest                                                                                                                          | 18             |                |
| Outcome data             | 15* | Report numbers of outcome events or summary measures                                                                                                                                                         | 9              |                |
| Main results             | 16  | (a) Give unadjusted estimates and, if applicable, confounder-adjusted estimates and their precision (eg, 95% confidence interval). Make clear which confounders were adjusted for and why they were included | 19-20          |                |
|                          |     | (b) Report category boundaries when continuous variables were categorized                                                                                                                                    |                | Not applicable |
|                          |     | (c) If relevant, consider translating estimates of relative risk into absolute risk for a meaningful time period                                                                                             |                | Not applicable |
| Other analyses           | 17  | Report other analyses done—eg analyses of subgroups and interactions, and sensitivity analyses                                                                                                               | Not applicable |                |
| <b>Discussion</b>        |     |                                                                                                                                                                                                              |                |                |
| Key results              | 18  | Summarise key results with reference to study objectives                                                                                                                                                     | 11-12          |                |
| Limitations              | 19  | Discuss limitations of the study, taking into account sources of potential bias or imprecision. Discuss both direction and magnitude of any potential bias                                                   | 12-13          |                |
| Interpretation           | 20  | Give a cautious overall interpretation of results considering objectives, limitations, multiplicity of analyses, results from similar studies, and other relevant evidence                                   | 11-12          |                |
| Generalisability         | 21  | Discuss the generalisability (external validity) of the study results                                                                                                                                        | 12             |                |
| <b>Other information</b> |     |                                                                                                                                                                                                              |                |                |
| Funding                  | 22  | Give the source of funding and the role of the funders for the present study and, if applicable, for the original study on which the present article is based                                                | 13             |                |

\*Give information separately for exposed and unexposed groups.

**Note:** An Explanation and Elaboration article discusses each checklist item and gives methodological background and published examples of transparent reporting. The STROBE checklist is best used in conjunction with this article (freely available on the Web sites of PLoS Medicine at <http://www.plosmedicine.org/>, Annals of Internal Medicine at <http://www.annals.org/>, and Epidemiology at <http://www.epidem.com/>). Information on the STROBE Initiative is available at [www.strobe-statement.org](http://www.strobe-statement.org).

# BMJ Open

## Mediating effect of health consciousness in the relationship of lifestyle and suboptimal health status: A cross-sectional study involving Chinese urban residents

|                                 |                                                                                                                                                                                                                                                                                                                                                                                                                                                                                                                                                                                                                                                             |
|---------------------------------|-------------------------------------------------------------------------------------------------------------------------------------------------------------------------------------------------------------------------------------------------------------------------------------------------------------------------------------------------------------------------------------------------------------------------------------------------------------------------------------------------------------------------------------------------------------------------------------------------------------------------------------------------------------|
| Journal:                        | <i>BMJ Open</i>                                                                                                                                                                                                                                                                                                                                                                                                                                                                                                                                                                                                                                             |
| Manuscript ID                   | bmjopen-2020-039701.R1                                                                                                                                                                                                                                                                                                                                                                                                                                                                                                                                                                                                                                      |
| Article Type:                   | Original research                                                                                                                                                                                                                                                                                                                                                                                                                                                                                                                                                                                                                                           |
| Date Submitted by the Author:   | 13-Aug-2020                                                                                                                                                                                                                                                                                                                                                                                                                                                                                                                                                                                                                                                 |
| Complete List of Authors:       | xue, yunlian; Guangdong Provincial People's Hospital, Statistics Section<br>liu, guihao; Guangdong Provincial People's Hospital, General Committee Office<br>Feng, Yefang; Southern Medical University Nanfang Hospital, Sanitation Economy Administration<br>Xu, Mengyao ; Southern Medical University Nanfang Hospital, Sanitation Economy Administration<br>Jiang, Lijie ; Southern Medical University Nanfang Hospital, Sanitation Economy Administration<br>Lin, Yuanqi ; Southern Medical University Nanfang Hospital, Sanitation Economy Administration<br>Xu, Jun ; Southern Medical University Nanfang Hospital, Sanitation Economy Administration |
| <b>Primary Subject Heading</b>: | Health policy                                                                                                                                                                                                                                                                                                                                                                                                                                                                                                                                                                                                                                               |
| Secondary Subject Heading:      | Public health                                                                                                                                                                                                                                                                                                                                                                                                                                                                                                                                                                                                                                               |
| Keywords:                       | Public health < INFECTIOUS DISEASES, Health policy < HEALTH SERVICES ADMINISTRATION & MANAGEMENT, Risk management < HEALTH SERVICES ADMINISTRATION & MANAGEMENT                                                                                                                                                                                                                                                                                                                                                                                                                                                                                             |
|                                 |                                                                                                                                                                                                                                                                                                                                                                                                                                                                                                                                                                                                                                                             |

SCHOLARONE™  
Manuscripts



I, the Submitting Author has the right to grant and does grant on behalf of all authors of the Work (as defined in the below author licence), an exclusive licence and/or a non-exclusive licence for contributions from authors who are: i) UK Crown employees; ii) where BMJ has agreed a CC-BY licence shall apply, and/or iii) in accordance with the terms applicable for US Federal Government officers or employees acting as part of their official duties; on a worldwide, perpetual, irrevocable, royalty-free basis to BMJ Publishing Group Ltd ("BMJ") its licensees and where the relevant Journal is co-owned by BMJ to the co-owners of the Journal, to publish the Work in this journal and any other BMJ products and to exploit all rights, as set out in our [licence](#).

The Submitting Author accepts and understands that any supply made under these terms is made by BMJ to the Submitting Author unless you are acting as an employee on behalf of your employer or a postgraduate student of an affiliated institution which is paying any applicable article publishing charge ("APC") for Open Access articles. Where the Submitting Author wishes to make the Work available on an Open Access basis (and intends to pay the relevant APC), the terms of reuse of such Open Access shall be governed by a Creative Commons licence – details of these licences and which [Creative Commons](#) licence will apply to this Work are set out in our licence referred to above.

Other than as permitted in any relevant BMJ Author's Self Archiving Policies, I confirm this Work has not been accepted for publication elsewhere, is not being considered for publication elsewhere and does not duplicate material already published. I confirm all authors consent to publication of this Work and authorise the granting of this licence.

1  
2  
3 Mediating effect of health consciousness in the relationship of lifestyle  
4  
5  
6 and suboptimal health status: A cross-sectional study involving Chinese  
7  
8 urban residents  
9

10  
11  
12  
13  
14 Yunlian Xue<sup>1,2,3</sup>, Guihao Liu<sup>2</sup>, Yefang Feng<sup>1</sup>, Mengyao Xu<sup>1</sup>, Lijie Jiang<sup>1</sup>, Yuanqi Lin<sup>1</sup>,  
15  
16 Jun Xu<sup>1\*</sup>  
17

18  
19  
20  
21 <sup>1</sup> Department of Sanitation Economy Administration, Nanfang Hospital, Southern  
22  
23 Medical University, Guangzhou, Guangdong Province, PR China  
24

25  
26 <sup>2</sup> Guangdong Provincial People's Hospital (Guangdong Academy of Medical  
27  
28 Sciences), Guangzhou, Guangdong Province, PR China  
29

30  
31 <sup>3</sup> School of Public Health, Southern Medical University, Guangzhou, Guangdong  
32  
33 Province, PR China  
34

35  
36  
37  
38  
39  
40  
41  
42 \* Correspondence: Jun Xu  
43

44 Department of Sanitation Economy Administration, Nanfang Hospital, Southern  
45  
46 Medical University, Guangzhou, Guangdong Province, PR China  
47

48 Email: drugstat@163.com  
49

50 Telephone: +86-020-61641888  
51  
52  
53  
54  
55  
56  
57  
58  
59  
60

## ABSTRACT

**Objective:** *Suboptimal health status* (SHS), a third state between good health and disease, can easily develop into chronic diseases, and can be influenced by lifestyle and health consciousness. No study has surveyed the intermediation of health consciousness on the relationship between lifestyle and SHS. This study aimed to analyze the association of lifestyle and SHS, and intermediation of health consciousness in Chinese urban residents.

**Design:** A cross-sectional face-to-face survey using a four-stage stratified sampling method.

**Participants:** We investigated 5,803 Chinese urban residents aged 18 years and over. We measured SHS using the Sub-Health Measurement Scale V1.0. We adopted a structural equation model (SEM) to analyze relationships among lifestyle, health consciousness, and SHS. We applied a bootstrapping method to estimate the mediation effect of health consciousness.

**Results:** Lifestyle had stronger indirect associations with physical ( $\beta$  -0.185, 95% CI -0.228 to -0.149), mental ( $\beta$  -0.224, 95% CI -0.265 to -0.186) and social SHS ( $\beta$  -0.216, 95% CI -0.257 to -0.179) via health consciousness than direct associations of physical ( $\beta$  -0.144, 95% CI -0.209 to -0.081), mental ( $\beta$  -0.146, 95% CI -0.201 to -0.094), and social SHS ( $\beta$  -0.130, 95% CI -0.181 to -0.077). Health consciousness has a strong direct association with physical ( $\beta$  0.360, 95% CI 0.295 to 0.427), mental ( $\beta$  0.452, 95% CI 0.392 to 0.510), and social suboptimal health ( $\beta$  0.434, 95% CI 0.376 to 0.490). Ratio of mediating effect of health consciousness to direct effect of lifestyle with physical, mental, and social SHS was 1.28, 1.53, and 1.66, respectively.

**Conclusions:** Health consciousness was more important in preventing physical, mental, and social SHS than lifestyle. Therefore, it might be useful in changing



1  
2  
3 unhealthy lifestyle and reducing the influence of poor lifestyle on physical, mental  
4 and social SHS.  
5  
6

### 7 **Strengths and limitations of this study**

- 8  
9
- 10 • The participants, who were recruited through a cross-sectional survey using a  
11 four-stage stratified sampling method, were representative of Chinese urban  
12 residents.  
13  
14
  - 15 • To the best of our knowledge, this is the first national representative analysis  
16 of the mediating effect of health consciousness on the association of lifestyle  
17 with physical, mental, and social SHS.  
18  
19
  - 20 • Although we used a four-stage stratified sampling method, sampling errors are  
21 still inevitable.  
22  
23
  - 24 • This study only included the seven most common lifestyle factors.  
25  
26  
27  
28  
29

30  
31 **Keywords:** Suboptimal health status, Lifestyle, Health consciousness, Urban  
32 residents, China  
33  
34  
35  
36  
37  
38  
39  
40  
41  
42  
43  
44  
45  
46  
47  
48  
49  
50  
51  
52  
53  
54  
55  
56  
57  
58  
59  
60

## INTRODUCTION

In 1946, the World Health Organization (WHO) <sup>1</sup> defined health as “a state of complete physical, mental, and social well-being and not merely the absence of disease or infirmity.” It is reported that non-communicable diseases (NCDs) account for an estimated 80% of the total deaths and 70% of the total number of disability-adjusted life-years (DALYs) in the early twentieth century.<sup>2</sup> Moreover, NCD increase steadily with urbanization and aging, <sup>3</sup> being attributed with more than 88% of total deaths in China in 2019.<sup>4</sup> Furthermore, a study pointed out that NCDs accounted for 18 of the 20 leading causes of age-standardized years lived with disability on a global scale.<sup>5</sup> The preclinical status of NCDs and its early detection have become major issues in the promotion of basic health service in the reform of health care.<sup>6</sup>

*Suboptimal health status* (SHS), an intermediate status between chronic disease and health, is believed to be a subclinical and reversible stage of chronic disease.<sup>7</sup> People in SHS, although without a diagnosable condition, are characterized by a decline in vitality and physiological function, ambiguous health complaints, general weakness, and lack of vitality. In fact, it has become a new public health challenge in China.<sup>8,9</sup>

It is reported that SHS can be measured objectively using microbiome,<sup>10</sup> telomere length,<sup>11</sup> plasma stress hormones,<sup>12</sup> plasma metabolites,<sup>13</sup> and glycan.<sup>14</sup> However, these objective measures are not easily accessible, and sometimes may not be obvious, especially when people have uncomfortable feelings without abnormal symptoms. A self-rated method that uses a questionnaire is widely applicable in assessing SHS. In China, the sub-health measurement scale (SHMS V1.0), suboptimal health status questionnaire (SHSQ-25)<sup>15</sup> and Chinese sub-health scale (CSHES)<sup>16</sup> were widely used for assessing SHS. However, compared to the other questionnaires, SHMS V1.0

1  
2  
3 assesses of the physical, mental, and social aspects of SHS, which is in accordance  
4 with the health concept proposed by WHO in 1947. SHS has a prevalence of above  
5 65% in China,<sup>17-20</sup> and has become an increasingly concerning problem in many  
6 countries.<sup>21 22</sup> Moreover, its prevalence may be severely underestimated since many  
7 individuals are not aware that they suffer from SHS. For instance, in an investigation  
8 involving 6,000 Chinese self-reported “healthy people,” 72.8% were in “suboptimal  
9 health status.”<sup>23</sup> Thus, identifying the influencing factors of SHS is important in  
10 preventing it, and would provide important information for first-level prevention of  
11 NCD. In accordance with the definition released by the WHO, SHS has three  
12 dimensions: physical, mental and social adaption.<sup>24</sup>

13  
14  
15  
16  
17  
18  
19  
20  
21  
22  
23  
24  
25  
26  
27  
28  
29  
30  
31  
32  
33  
34  
35  
36  
37  
38  
39  
40  
41  
42  
43  
44  
45  
46  
47  
48  
49  
50  
51  
52  
53  
54  
55  
56  
57  
58  
59  
60  
Lifestyle is an important factor associated with SHS. This includes smoking,  
alcohol use, skipping breakfast, poor nutrition, lack of exercise, and sleep problems.<sup>25</sup>  
<sup>26</sup> In SHS, individuals can prevent a chronic disease by modifying their poor lifestyles,  
as supported by China's Blue Book on Self-Care.<sup>27</sup> Although, it is a given fact that  
individuals ought to change their bad lifestyles when experiencing adverse health  
issues, this is difficult to achieve in practice.<sup>28 29</sup> Studies revealed that better  
knowledge and strong beliefs improve the adherence to lifestyle changes<sup>30 31</sup> and  
prevent and control chronic diseases;<sup>32 33</sup> better knowledge and strong beliefs are  
important expressions of health consciousness.

*Health consciousness* is a psychological construct that corresponds to the  
awareness about one's health, and the willingness to change one's behaviors in order  
to improve it.<sup>34 35</sup> Moreover, it is related to anxiety, stress, depression, and  
non-treatable diseases.<sup>36</sup> However, to our knowledge, there are on studies anent the  
association of health consciousness to SHS. People may present different suboptimal  
health states in their physical, mental, and social adaptation; thus, it is necessary to

1  
2  
3 analyze SHS separately. We aimed to investigate whether improved health  
4 consciousness is associated with better lifestyle and less physical, mental and social  
5 SHS. Moreover, we aimed to discover the possible mediating effect of health  
6 consciousness on the association of lifestyle with physical, mental, and social SHS.  
7  
8 Thus, we used structural equation models to clarify these questions, on the basis of a  
9  
10 national representative sample of Chinese urban residents.  
11  
12  
13  
14  
15

## 16 **METHODS**

### 17 **Study design and population**

18  
19 We conducted a cross-sectional survey using a four-stage stratified sampling method  
20 from December 2017 to October 2018. In the first stage, we chose one province each  
21 from five administrative divisions in China; we selected Guangdong province,  
22 Heilongjiang province, Sichuan province, Gansu province, and Tianjin city. Second,  
23 we chose three to four cities from each province by considering their level of  
24 economic development and regional distribution. Subsequently, we randomly selected  
25 two to four streets in the selected urban areas. Lastly, we investigated the urban  
26 residents who conveniently qualified from each street.  
27  
28  
29  
30  
31  
32  
33  
34  
35  
36  
37  
38  
39

40 This study included individuals aged 18 years and older, who lived in an urban area  
41 for more than six months, and volunteered in our investigation. We excluded  
42 individuals who had a confirmed disease in the last two months, were unable to  
43 complete the questionnaire due to visual or hearing impairment, and with missing  
44 values in lifestyle, health consciousness, and SHS items. We investigated a total of  
45 6,578 individuals and excluded 775. Thus, we analyzed a total of 5,803 urban  
46 residents. Among them, 1,704, 1,328, 954, 925, and 892 participants were from  
47 Guangdong, Heilongjiang, Sichuan, Gansu, and Tianjin provinces, respectively. All  
48 participants that volunteered provided their verbal consent prior to data collection, and  
49  
50  
51  
52  
53  
54  
55  
56  
57  
58  
59  
60

1  
2  
3 were given the option to cease from participating anytime. They were also invited to  
4  
5 give advices regarding the questionnaire. This study was approved by Medical Ethics  
6  
7 committee of Nanfang Hospital of Southern Medical University (No.  
8  
9 NFEC-2019-196). All data were kept strictly confidential.  
10  
11

## 12 **Patient and Public Involvement**

13  
14  
15 The participants were not involved in the development of the research question or  
16  
17 design of this study. However, we disseminated the results of this analysis through  
18  
19 public conferences, including summarized statements and open access to the  
20  
21 published reports.  
22

## 23 **Survey instrument**

24  
25 We used a self-designed questionnaire for investigation, which is comprised of four  
26  
27 parts: general demographic characteristics, which included age, gender, marital status,  
28  
29 highest education level, per capita monthly household income, and insurance; lifestyle,  
30  
31 which included smoking, bad diet habit, alcohol intake, breakfast consumption,  
32  
33 physical exercise, early to bed (before 11 pm), and sleep time; health consciousness,  
34  
35 which included health knowledge, care for health, and effect of leisure promoting  
36  
37 health; and sub-health measurement scale (SHMS) V1.0. Each volunteer completed  
38  
39 the questionnaire within 30 minutes. Verbal consents were deemed to be sufficient  
40  
41 because the participants had volunteered for the study and could refuse to take part if  
42  
43 they wished. The objective of the survey was to study the health status of the  
44  
45 participants rather than intervene. All data were kept strictly confidential. The ethics  
46  
47 committee approved the consent procedure.  
48  
49  
50  
51  
52

## 53 **SHS assessment**

54  
55 We performed suboptimal health status assessment using SHMS V1.0, which was  
56  
57 developed by our research group. It comprised of 39 items<sup>24</sup> that were proven to have  
58  
59  
60

1  
2  
3 high reliability and validity in a Chinese population.<sup>37</sup> SHMS V1.0 consists of three  
4 subscales: physical suboptimal health status (PS), mental suboptimal health status  
5 (MS), and social suboptimal health status (SS). PS consists of 14 items that comprises  
6 four factors: physical condition, organ function, body movement function, and vigor.  
7  
8 MS consists of 12 items that comprises three factors: positive emotion, psychological  
9 symptoms, and cognitive function. SS consists of nine items that comprises three  
10 factors: social adjustment, social resources, and social support. For each item, there  
11 are five response categories (1=*none*, 2=*occasionally*, 3=*sometimes*, 4=*constantly*,  
12 and 5=*always*) that correspond to the frequency of occurrence of each symptom. We  
13 asked the participants regarding the uncomfortable symptoms that they had during the  
14 previous month. We then calculated the total scores. A low total score represents a  
15 low estimate of SHS (i.e., poor health). The cut-off value for suboptimal health  
16 diagnosis referred to norms of SHMS V1.0 for Chinese urban residents were  
17 established by our research group.<sup>38</sup>

### 35 **Lifestyle evaluation**

36  
37 Smoking was comprised of none smokers, past smokers, and current smokers. Bad  
38 diet habit was divided into “yes” (if any one of the following seven situations exist:  
39 irregular eating time, dieting, overeating, dietary bias or pickiness, salty tasty, spicy  
40 tasty, and using snacks instead of meals), and “no”. Alcohol intake was divided into  
41 “never,” “occasionally,” “little everyday,” and “much everyday.” Breakfast  
42 consumption was comprised of “never,” “occasionally” (i.e., one or two days a week),  
43 “sometimes” (i.e., three or four days a week), “frequently” (i.e., five or six days a  
44 week), and “everyday.” Physical exercise was divided into “everyday,” “frequently”  
45 (i.e., five or six days a week), “sometimes” (i.e., three or four days a week), and  
46 “occasionally” (i.e., one or two days a week, and no physical exercise). Sleep time  
47  
48  
49  
50  
51  
52  
53  
54  
55  
56  
57  
58  
59  
60

1  
2  
3 were divided into three groups, “<7hours/day,” “7-9hours/day,” and “≥9hours/day.”

#### 6 **Health consciousness evaluation**

7  
8 Health knowledge and attention to health consisted of “very few/low,” “few/low,”  
9  
10 “general,” “much/high,” and “very much/high.” Effect of leisure on health consisted  
11  
12 of “no effect,” “some effect,” and “very effective.”

#### 15 **Quality control and Data management**

16  
17 The investigators for each site were trained through face-to-face, video conferencing,  
18  
19 and telephone. Before the conduct of the investigation, we made sure that its purpose  
20  
21 and importance were explained to the participants in detail, and obtained their  
22  
23 verbal informed consent. The respondents answered the questionnaires independently  
24  
25 and according to their own understanding, while missing data were re-answered after  
26  
27 checking by the investigators. Before data coding and entry, suspicious duplicate  
28  
29 questionnaires, which are those with a repetition rate higher than 80% and completion  
30  
31 rate lower than 80% were excluded. All questionnaire data were double-entered using  
32  
33 Epidata 3.1 software. The two data sets were cross compared for validity and errors.  
34  
35  
36

#### 38 **Statistical analysis**

39  
40 Description was using means (standard deviations) and proportions. We used a  
41  
42 one-way ANOVA with LSD-test for multiple comparisons. Cluster effect nested  
43  
44 within sampling regions was examined by using interclass correlation coefficient  
45  
46 (ICC) calculated in a two-level linear multilevel model. We used structural equation  
47  
48 modeling (SEM) to analyze the complexity of associations between lifestyle, health  
49  
50 consciousness, and SHS (Model 1: SEM model of lifestyle, health consciousness, and  
51  
52 PS; Model 2: SEM model of lifestyle, health consciousness, and MS; Model 3: SEM  
53  
54 model of lifestyle, health consciousness, and SS). Mediating effect of health  
55  
56 consciousness was the same with indirect association of lifestyle and SHS via health  
57  
58  
59  
60

1  
2  
3 consciousness. Ratio of mediating effect of health consciousness to direct effect of  
4 lifestyle (indirect effect divided by direct effect) and proportion of mediating effect of  
5 health consciousness to total effect (indirect effect divided by total effect multiply by  
6 a hundred) of lifestyle with physical, mental, and social SHS were also calculated. We  
7 used the relative  $\chi^2$  (CMIN/DF), root mean-square error of approximation (RMSEA),  
8 comparative fit index (CFI), goodness-of-fit index (GFI), and adjusted goodness-of-fit  
9 index (AGFI) to assess the model fit. We applied the bootstrapping method of repeat  
10 sampling by 2,000 times to verify statistical significance and calculate the confidence  
11 intervals for the direct, indirect, and total effects. Participants with missing data were  
12 deleted from analysis. All *P*-values were two sided, with values < 0.05 considered as  
13 statistically significant. We used IBM SPSS Statistics 20.0 for descriptive analysis.  
14  
15 Lastly, we conducted SEM analysis with AMOS (SPSS Statistics version 20.0, SPSS  
16 Inc., Chicago, IL).

## 33 RESULTS

### 36 Participants' demographic characteristics

37  
38 Baseline characteristics of all study participants are presented in Table 1. Of the 5,803  
39 participants, 2,772 (47.77%) were men and 3,031 (52.23%) were women. The mean  
40 age was 40.90±15.46 years. Most of the participants (65.98%) were married.  
41 Moreover, 1,939 (57.21%) of the participants have a per capita monthly household  
42 income (RMB) of less than 5,000 RMB. Participants with compulsory school (up to  
43 grade 9), high school, junior college, and university degree and above were 1,341  
44 (23.1%), 1,298 (22.4%), 1,374 (23.7%) and 1,786 (30.8%), respectively.

### 55 Association of lifestyle, health consciousness, and SHS

56  
57 The mean (*SD*) of the overall SHS, PS, MS and SS transformed scores were 67.15  
58 (11.99), 70.92 (12.67), 67.01 (14.55), and 61.46 (15.56), respectively. The ANOVA  
59  
60



1  
2  
3 results showed that various groups of lifestyle and health consciousness differed on  
4 physical SHS, mental SHS, and social SHS (Table 2). People who never smoked had  
5 the highest physical and social SHS scores; however, participants who quit smoking  
6 had lower physical, mental, and social SHS scores than participants who were still  
7 smoking. People who had bad diet habits and consumed the most alcohol had the  
8 lowest physical, mental, and social SHS scores. Physical, mental, and social SHS  
9 scores were higher for participants who regularly consumed breakfast, engaged in  
10 regular physical exercise, had early bedtimes (i.e., before 11 P.M.), and longer sleep  
11 duration.  
12  
13  
14  
15  
16  
17  
18  
19  
20  
21  
22

### 23 **SEM analysis of lifestyle, health consciousness, and SHS**

24 Because we used the multi-stage sampling method in this study, there might be a  
25 cluster effect nested within sampling regions. We examined ICC and its significance  
26 using a two-level linear multilevel model. For physical, mental, and social SHS, there  
27 was no cluster effect in the regions, while the ICC was 0.028, 0.01, and 0.035, with P  
28 values of 0.085, 0.103, and 0.084, respectively. Thus, traditional SEM models could  
29 be used in the analysis of the association of lifestyle, health consciousness, and SHS  
30 (Figure 1). Three models fit reasonably well to the data. As shown in the models: (1)  
31 all indicator variables that we hypothesized as predictors were significantly related to  
32 their respective latent factors,  $P < 0.001$ ; (2) lifestyle had a direct negative association  
33 with PS ( $\beta -0.14$ ,  $P < 0.001$ ), MS ( $\beta -0.15$ ,  $P < 0.001$ ) and SS ( $\beta -0.13$ ,  $P < 0.001$ ); (3)  
34 health consciousness had direct positive association with PS ( $\beta 0.36$ ,  $P < 0.001$ ), MS  
35 ( $\beta 0.452$ ,  $P < 0.001$ ), and SS ( $\beta 0.434$ ,  $P < 0.001$ ), and mediating effects on the  
36 association of lifestyle with PS, MS and SS.  
37  
38  
39  
40  
41  
42  
43  
44  
45  
46  
47  
48  
49  
50  
51  
52  
53  
54

55 The association paths of lifestyle and health consciousness on SHS are presented in  
56 Table 3. Although lifestyle and health consciousness were both associated with SHS,  
57  
58  
59  
60

1  
2  
3 health consciousness had larger associations with PS ( $\beta$  0.360), MS ( $\beta$  0.452), and SS  
4 ( $\beta$  0.434) than lifestyle ( $\beta$  -0.329, -0.370, and -0.345 respectively). Association of  
5  
6 lifestyle and PS could be direct ( $\beta$  -0.144, 95% CI -0.209 to -0.081)) and indirect ( $\beta$   
7  
8 -0.185, 95% CI -0.228 to -0.149), with faintly larger indirect association than direct  
9  
10 association. However, the indirect association ( $\beta$  -0.224, 95% CI -0.265 to -0.186) of  
11  
12 lifestyle and MS was obviously higher than direct association ( $\beta$  -0.146, 95% CI  
13  
14 -0.201 to -0.094). The same higher indirect association ( $\beta$  -0.216, 95% CI -0.257 to  
15  
16 -0.179) was found in the association of lifestyle and SS than direct association ( $\beta$   
17  
18 -0.130, 95% CI -0.181 to -0.077). Ratio of mediating effect of health consciousness to  
19  
20 direct effect of lifestyle with physical, mental, and social SHS was 1.28, 1.53, and  
21  
22 1.66, respectively. Proportion of mediating effect of health consciousness to total  
23  
24 effect of lifestyle with physical, mental, and social SHS was 56.23%, 60.54%, and  
25  
26 62.61%, respectively.

## 33 DISCUSSION

34  
35  
36 In this large cross-sectional study involving a nationally representative sample, we  
37  
38 found that lifestyle health consciousness showed significantly mediating effects on the  
39  
40 association of lifestyle with PS, MS and SS. The direct associations of PS, MS, and  
41  
42 SS with health consciousness were all significantly higher than lifestyle. However, the  
43  
44 indirect associations of lifestyle with PS, MS and SS were higher than indirect  
45  
46 associations via health consciousness.  
47  
48

49  
50 SHS is a subjective feeling that lacks objective clinical diagnostics; thus, a  
51  
52 self-assessed questionnaire is the most appropriate method of determining it. SHMS  
53  
54 V1.0 is a multidimensional scale that includes physical, mental, and social dimensions  
55  
56 that correspond to the WHO's more comprehensive definition of health.<sup>39</sup> Moreover,  
57  
58 it is widely used in China for assessing SHS in urban residents, workers and  
59  
60

1  
2  
3 students.<sup>17 18 24 26</sup> We found that Chinese urban residents had low scores in PS, MS  
4 and SS, which means that they are at high risk to SHS in physical, mental, and social  
5  
6  
7  
8  
9  
10  
11  
12  
13  
14  
15  
16  
17  
18  
19  
20  
21  
22  
23  
24  
25  
26  
27  
28  
29  
30  
31  
32  
33  
34  
35  
36  
37  
38  
39  
40  
41  
42  
43  
44  
45  
46  
47  
48  
49  
50  
51  
52  
53  
54  
55  
56  
57  
58  
59  
60

students.<sup>17 18 24 26</sup> We found that Chinese urban residents had low scores in PS, MS and SS, which means that they are at high risk to SHS in physical, mental, and social adaptation. This result is in accordance with other studies involving young and middle-aged intellectuals in Guangzhou,<sup>40</sup> Chinese migrant workers,<sup>41</sup> and those that use other SHS evaluation questionnaires in China, such as the SHSQ-25.<sup>6 9</sup> Similarly, African<sup>14</sup> and Caucasian<sup>42</sup> studies showed the same SHS rate.

To the best of our knowledge, this is the first national representative analysis of the mediating effect of health consciousness on the association of lifestyle with physical, mental and social SHS. All variables included in lifestyle and health consciousness were accordingly significantly associated. Urban residents who engage in unhealthy lifestyle practices, such as smoking, alcohol intake, bad diet habits, irregular breakfast consumption, less physical exercises, less frequent early to bed, and short sleep time were more likely to get into PS, MS and SS. A study<sup>39</sup> revealed that breakfast eating habits are significantly associated with lifestyle, and appear to be a useful predictor of a healthy lifestyle; people who skip breakfast are prone to unhealthy behaviors, such as limited exercise.<sup>43</sup> Moreover, insufficient sleep is associated with several health-risk behaviors,<sup>44</sup> such as not meeting physical activity recommendations,<sup>45</sup> using cigarettes and alcohol, and feeling sad or hopeless.<sup>46</sup> Furthermore, poor diet was the third greatest influencing factor for physical and social health, which was in line with previous studies.<sup>47 48</sup>

This study investigated the significant associations of health consciousness with PS, MS, and SS, which were relatively more significant than those of lifestyle. Moreover, in this study, health consciousness, included health knowledge, attention to health, and effect of leisure on health. As the internal power of healthy behavior, health consciousness is the most important and fundamental factor in promoting health. In

1  
2  
3 fact, individuals who had more health knowledge believed that they had control over  
4  
5 their health.<sup>49</sup>  
6

7  
8 The most important finding was that health consciousness played a mediating effect  
9  
10 in the relationship of lifestyle with physical, mental and social SHS, which was higher  
11  
12 than direct effect of lifestyle. Studies have shown that health consciousness is  
13  
14 correlated with health behavior, information seeking and health coping.<sup>50</sup> Modifying  
15  
16 the attitudes is effective in promoting changes in health behavior,<sup>51</sup> since  
17  
18 health-conscious people are attentive to health warnings regarding the risks of having  
19  
20 an unhealthy lifestyle.<sup>52</sup>  
21  
22

### 23 24 **Limitations**

25  
26 This study has some limitations. First, although we used face-to-face interviews, all  
27  
28 data were collected from a respondent-completed questionnaire; thus, responses may  
29  
30 have a level of inherent inaccuracy or bias. Second, although we used a four-stage  
31  
32 stratified sampling method, sampling errors are still inevitable. Lastly, this study only  
33  
34 included the seven most common lifestyle factors.  
35  
36

### 37 38 **CONCLUSION**

39  
40 In this large representative cross-sectional study of Chinese urban residents, we found  
41  
42 that direct association of lifestyle with physical, mental, and social SHS were smaller  
43  
44 than direct association and mediating effect of health consciousness. Moreover, health  
45  
46 consciousness was more important in preventing physical, mental, and social SHS  
47  
48 than lifestyle, and might be useful in changing unhealthy lifestyle and reducing the  
49  
50 influence of poor lifestyle on physical, mental, and social SHS.  
51  
52  
53

### 54 55 56 **Acknowledgments**

57  
58 The authors thank all study participants. We also thank the investigators and students  
59  
60

1  
2  
3 for their assistance in this research.  
4  
5  
6  
7

### 8 **Funding**

9  
10 This research was supported by the National Natural Science Fund, National Natural  
11 Science Foundation of China (No: 71673126), and the Science and Technology  
12 Planning Project of Guangzhou City of China (No: 201803010089).  
13  
14  
15  
16  
17

### 18 **Role of the funding source**

19  
20 The sponsors of the study had no role in the study design, data collection, data  
21 analysis, or data interpretation. The corresponding author had full access to all the  
22 data in the study and had final responsibility for the decision to submit for publication.  
23  
24  
25  
26  
27  
28  
29

### 30 **Competing Interests**

31  
32 No declared  
33  
34  
35  
36  
37

### 38 **Author Contributions**

39  
40 XJ developed the questionnaire and study design, supervised the analysis and  
41 contributed to the final version of the manuscript. XYL did the analyses and wrote the  
42 first draft. LGH, FYF, XMY, LYQ and JLJ were in charge of the investigation. All  
43 authors contributed to and read the final draft of the manuscript.  
44  
45  
46  
47  
48  
49  
50

### 51 **Patient consent for publication**

52  
53 Not required  
54  
55  
56  
57

### 58 **Ethics approval**

Ethics approval to collect the patients' data was obtained from the Ethics Committee of the NanFang Hospital of Southern Medical University (NFEC-2019-196).

### Data availability statement

Data are available upon reasonable request. Data are available upon reasonable request. Readers can contact Xu Jun (drugstat@163.com) to submit raw data access requirements.

### References

- 1 World Health Organization: What is the WHO definition of health? World Health Organization. <http://www.who.int/suggestions/faq/en/>. Accessed 23 Mar 2020.
- 2 Strong K, Mathers C, Leeder S, *et al*. Preventing chronic diseases: how many lives can we save? *Lancet* 2005;366:1578-82
- 3 Wang L, Kong LZ, Wu F, *et al*. Preventing chronic diseases in China. *Lancet* 2005;366:1821-4.
- 4 Transcript of press conference of the office of Health China action Promotion Committee on July 31, 2019. <http://www.nhc.gov.cn/xcs/s7847/201907/0d95adec49f84810a6d45a0a1e997d67.shtml>
- 5 GBD 2015 Mortality and Causes of Death Collaborators. Global, regional, and national life expectancy, all-cause mortality, and cause-specific mortality for 249 causes of death, 1980-2015: a systematic analysis for the Global Burden of Disease Study 2015. *Lancet* 2016;388(10053):1459-544.
- 6 Wang Y, Ge S, Yan Y, *et al*. China suboptimal health cohort study: Rationale, design and baseline characteristics. *J. Transl. Med* 2016;14:291-302.
- 7 Wei Wang. Suboptimal health: a potential preventive instrument for non-communicable disease control and management. *J. Transl. Med* 2012, 10(2):A45.
- 8 Yan YX, Liu YQ, Li M, *et al*. Development and evaluation of a questionnaire for measuring suboptimal health status in urban Chinese. *Int. J. Epidemiol* 2009;19(6):333-41.

- 1
  - 2
  - 3
  - 4
  - 5
  - 6
  - 7
  - 8
  - 9
  - 10
  - 11
  - 12
  - 13
  - 14
  - 15
  - 16
  - 17
  - 18
  - 19
  - 20
  - 21
  - 22
  - 23
  - 24
  - 25
  - 26
  - 27
  - 28
  - 29
  - 30
  - 31
  - 32
  - 33
  - 34
  - 35
  - 36
  - 37
  - 38
  - 39
  - 40
  - 41
  - 42
  - 43
  - 44
  - 45
  - 46
  - 47
  - 48
  - 49
  - 50
  - 51
  - 52
  - 53
  - 54
  - 55
  - 56
  - 57
  - 58
  - 59
  - 60
- 9 Yan YX, Do J, Liu YQ, *et al.* Association of suboptimal health status and cardiovascular risk factors in urban Chinese workers. *J Urban Health* 2012; 89(2): 329-38.
- 10 Sun Q, Xu X, Zhang J, *et al.* Association of suboptimal health status with intestinal microbiota in Chinese youths. *J Cell Mol Med* 2020;24(2):1837-47.
- 11 Alzain MA, Asweto CO, Zhang J, *et al.* Telomere Length and Accelerated Biological Aging in the China Suboptimal Health Cohort: A Case-Control Study. *OMICS* 2017;21(6):333-9.
- 12 Yan YX, Wu LJ, Xiao HB, *et al.* Latent class analysis to evaluate performance of plasma cortisol, plasma catecholamines, and SHSQ-25 for early recognition of suboptimal health status. *EPMA J* 2018;9(3):299-305.
- 13 Wang H, Tian Q, Zhang J, *et al.* Population-based case-control study revealed metabolomic biomarkers of suboptimal health status in Chinese population-potential utility for innovative approach by predictive, preventive, and personalized medicine. *EPMA J* 2020;11(2):147-60.
- 14 Adua E, Memarian E, Russell A, *et al.* Utilization of N-glycosylation profiles as risk stratification biomarkers for suboptimal health status and metabolic syndrome in a Ghanaian population. *Biomark Med* 2019;13(15):1273-87.
- 15 Yan YZ, Dong J, Li M, *et al.* Establishment of cut off point for suboptimal health status using SHSQ-25. *Chinese Journal of Health Statistics* 2011;28(3): 256-8
- 16 Xu L, Ni HM, Shen HY, *et al.* Item selection in development of Chinese sub-health state evaluation scale. *Chinese Journal of Health Statistics* 2012;29(1):10-3.
- 17 Xue YL, Xu J, Liu GH, *et al.* Study of association between personality and sub-health status among urban residents aged more than 14 years old in 4 cities in China. *J Southern Med Univ* 2019,39(4):443-9.
- 18 Xue YL, Xu J, Liu GH, *et al.* The mediating effect of adversity quotient on the correlation between stressful life events and sub-health status. *Modern Preventive Medicine* 2019,46(1):82-5,90.
- 19 Sun X, Wei M, Zhu C, *et al.* The epidemiological investigation of sub-health status in Guangdong. *Shandong Med J* 2008; 48:59-60
- 20 Xie J, Luo HB, Zhu H, *et al.* Prevalence and influence factors of sub-health status among urban residents in Tianjin. *Chin J Public Health* 2016;32:76-80.

- 1  
2  
3  
4  
5  
6  
7  
8  
9  
10  
11  
12  
13  
14  
15  
16  
17  
18  
19  
20  
21  
22  
23  
24  
25  
26  
27  
28  
29  
30  
31  
32  
33  
34  
35  
36  
37  
38  
39  
40  
41  
42  
43  
44  
45  
46  
47  
48  
49  
50  
51  
52  
53  
54  
55  
56  
57  
58  
59  
60
- 21 Sou J, Goldenberg S M, Duff P, *et al.* Recent im/migration to Canada linked to unmet health needs among sex workers in Vancouver, Canada: Findings of a longitudinal study. *Issues in Health Care of Women* 2017;38(5):492-506.
  - 22 Dunstan RH, Sparkes DL, Roberts TK, *et al.* Development of a complex amino acid supplement, Fatigue Reviva, for oral ingestion: initial evaluations of product concept and impact on symptoms of suboptimal health in a group of males. *Nutr J* 2013; 12:115.
  - 23 Liu Z, Li M. The third state and psychosomatic medicine research. *Med Philosophy* 2001;22(1):36–8.
  - 24 Bi JL, Huang Y, Xiao Y, *et al.* Association of lifestyle factors and suboptimal health status: a cross sectional study of Chinese students. *BMJ Open* 2014;4: e005156.
  - 25 Lolokote S, Hidru TH, Li X. Do socio-cultural factors influence college students' self-rated health status and health-promoting lifestyle behaviors? A cross-sectional multicenter study in Dalian, China. *BMC Public Health* 2017; 17: 478.
  - 26 Chen J, Xiang H, Jiang P, *et al.* The role of healthy lifestyle behaviors in the implementation of regressing suboptimal health status among college students in China: A nested case-control study. *Int J Environ Res Public Health* 2017; 14: 240.
  - 27 Ping Xie. Blue Book of Investment: Annual Report on The Development of China's Investment (2015). *Soc Science Acad Press* 2015.
  - 28 Siripitayakunkit A, Hanucharurnkul S, Gail D' Eramo Melkus, *et al.* Factors Contributing to Integrating Lifestyle in Thai Women with Type 2 Diabetes. *Hanucharurnkul S* 2010.
  - 29 Barclay C, Procter KL, Glendenning R, *et al.* Can type 2 diabetes be prevented in UK general practice? A lifestyle-change feasibility study (ISIAAH). *Br J Gen Pract* 2008; 58(553):541-7.
  - 30 Alm-Roijer C, Stagmo M, Uden G, *et al.* Better knowledge improves adherence to lifestyle changes and medication in patients with coronary heart disease. *Eur J Cardiovasc Nurs* 2004; 3(4):321-30.
  - 31 Jasmine TJX, Wai-Chi SC, Hegney DG. The impact of knowledge and beliefs on adherence to cardiac rehabilitation programs in patients with heart failure: A systematic review. *Jbi Database of Systematic Reviews & Implementation*



- 1  
2  
3  
4  
5  
6  
7  
8  
9  
10  
11  
12  
13  
14  
15  
16  
17  
18  
19  
20  
21  
22  
23  
24  
25  
26  
27  
28  
29  
30  
31  
32  
33  
34  
35  
36  
37  
38  
39  
40  
41  
42  
43  
44  
45  
46  
47  
48  
49  
50  
51  
52  
53  
54  
55  
56  
57  
58  
59  
60
- Reports* 2012; 10(7):399-470.
- 32 Kitson A, Brook A, Harvey G, *et al.* Using Complexity and Network Concepts to Inform Healthcare Knowledge Translation. *Int J Health Policy Manag* 2017; 7: 231.
- 33 Gazmararian JA, Williams MV, Peel J, *et al.* Health Literacy and Knowledge of Chronic Disease. *Patient Educ Couns* 2003; 51(3):267-75.
- 34 Gould, SJ. Consumer attitudes toward health and health care: A differential perspective. *J Consum Aff* 1988; 22, 96-118.
- 35 Michaelidou, N, Hassan, LM. The role of health consciousness, food safety concern and ethical identity on attitudes and intentions towards organic food. *J Consum Stud* 2008; 32, 163-70.
- 36 Dumitrescu AL, Kawamura M, Dogaru B, Dogaru C. Investigating the relationship between self-reported oral health status, oral health-related behaviours and self-consciousness in Romania. *Oral Health Prev Dent* 2008; 6(2):95.
- 37 Lu Y, Xu J, Cai YJ, *et al.* Reliability and Validity of SHS Measurement Scale Version 1.0 for Measuring the SHS of Urban Residents in Three Districts. *Chin. J. Health Psychol* 2013;21(5):707-8.
- 38 Xu J, Xue YL, Liu GH, *et al.* Establishment of the norms of Sub-Health Measurement Scale Version 1.0 for Chinese urban residents. *J South Med Univ* 2019;39(3):271-8.
- 39 Chen JY, Cheng JR, Liu YY, *et al.* Associations between breakfast eating habits and health-promoting lifestyle behaviors, suboptimal health status in Southern China: A population based, cross sectional study. *J Transl Med* 2014;12:348.
- 40 Cui ZG, Xu J, Wu WX, *et al.* Study of status and its impacting factors of sub-health in young and middle-aged intellectuals in Guangzhou. *Chin Med Herald* 2015;12(30):12-6.
- 41 Huang XW, Xu J, Wu WX, *et al.* Status and Influencing Factors of Sub-health in New Generation of Chinese Migrant Workers in Pearl River Delta of China. *Chin Gen Prac* 2017;20(1): 95-103.
- 42 Adua E, Roberts P, Wang W. Incorporation of suboptimal health status as a potential risk assessment for type II diabetes mellitus: a case-control study in a Ghanaian population. *EPMA J* 2017;8(4):345-55.
- 43 Keskirahkonen A, Kaprio J, Rissanen A, *et al.* Breakfast skipping and

- 1  
2  
3 health-compromising behaviors in adolescents and adults. *Eur J Clin Nutr* 2003;  
4 57: 842-53.  
5  
6  
7 44 Ma C, Xu W, Zhou L, *et al.* Association between lifestyle behaviors and  
8 suboptimal health status among Chinese college freshmen: A cross-sectional  
9 study. *BMC Public Health* 2018; 18: 105.  
10  
11  
12 45 Stea TH, Knutsen T, Torstveit MK. Association between short time in bed,  
13 health-risk behaviors and poor academic achievement among Norwegian  
14 adolescents. *Sleep Medicine* 2014; 15: 666-71.  
15  
16  
17 46 Zahra J, Ford T, Jodrell D. Cross-sectional survey of daily junk food consumption,  
18 irregular eating, mental and physical health and parenting style of British  
19 secondary school children. *Child Care Hlth Dev* 2014; 40: 481.  
20  
21  
22 47 Nielsen M B, Gjerstad J, Frone M. Alcohol use among Norwegian workers:  
23 Associations with health and well-being. *Occup Med* 2018; 68: 96-8.  
24  
25  
26 48 Steele J, Lisher J, Skivington M, *et al.* A higher effort-based paradigm in physical  
27 activity and exercise for public health: Making the case for a greater emphasis on  
28 resistance training. *BMC Public Health* 2017; 17: 300.  
29  
30  
31 49 Zhubing S, Zhenyi W. A correlation research of university students' lifestyle  
32 behaviors and psychological sub-health in Guizhou. *J. Nanjing Univ. Nat. Sci*  
33 2014;13:155-60.  
34  
35  
36 50 Hovick S, Nevarez L, Lloyd S, *et al.* An examination of health consciousness and  
37 its' link to health behavior[C]// 140st APHA Annual Meeting and Exposition  
38 2012. 2012.  
39  
40  
41 51 Sheeran P, Maki A, Montanaro E, *et al.* The impact of changing attitudes, norms,  
42 and self-efficacy on health-related intentions and behavior: A meta-analysis. *Pers*  
43 *Psychol* 2016; 66:1178-88.  
44  
45  
46 52 Kaskutas L A, Greenfield T K. The Role of Health Consciousness in Predicting  
47 Attention to Health Warning Messages. *Am J Health Promot* 1997; 11(3):186-93.  
48  
49  
50  
51  
52  
53  
54  
55  
56  
57  
58  
59  
60

Table 1 Participant's demographic characteristics (n=3535)

| Characteristic                            | <i>N</i> | %     |
|-------------------------------------------|----------|-------|
| Gender                                    |          |       |
| Man                                       | 2772     | 47.77 |
| Woman                                     | 3031     | 52.23 |
| Married status                            |          |       |
| Unmarried                                 | 1556     | 26.81 |
| Married                                   | 3829     | 65.98 |
| Divorced or widows                        | 386      | 6.65  |
| Information missing                       | 32       | 0.55  |
| Per capita monthly household income (RMB) |          |       |
| <5000                                     | 3320     | 57.21 |
| >=5000                                    | 2419     | 41.69 |
| Information missing                       | 64       | 1.10  |
| Highest education level                   |          |       |
| Compulsory school (through grade 9)       | 1343     | 23.14 |
| High school graduation                    | 1298     | 22.37 |
| Junior college degree                     | 1374     | 23.68 |
| University degree and above               | 1786     | 30.78 |
| Information missing                       | 2        | 0.03  |

Table 2 Group comparisons of lifestyle, health consciousness, and SHS

| Variates                     | N    | PS<br>Mean(SE)                    | MS<br>Mean(SE)                    | SS<br>Mean(SE)                    |
|------------------------------|------|-----------------------------------|-----------------------------------|-----------------------------------|
| <b>Smoking</b>               |      |                                   |                                   |                                   |
| Never                        | 3987 | 71.56(12.48) <sup>#^</sup>        | 67.13(14.46) <sup>#</sup>         | 62.15(15.16) <sup>#^</sup>        |
| Quit                         | 614  | 68.32(13.49) <sup>*^\$</sup>      | 65.41(15.11) <sup>*^\$</sup>      | 58.38(17.2) <sup>*^</sup>         |
| <20 cigarettes<br>/day       | 1027 | 70.31(12.67) <sup>*#</sup>        | 67.4(14.44) <sup>#</sup>          | 60.93(15.53) <sup>*#</sup>        |
| ≥ 20 cigarettes<br>/day      | 164  | 70.85(12.90) <sup>#</sup>         | 68.26(15.44) <sup>#</sup>         | 61.02(17.86)                      |
| <b>Bad diet habits</b>       |      |                                   |                                   |                                   |
| No                           | 3357 | 73.1(12.52) <sup>#</sup>          | 70.2(14.14) <sup>#</sup>          | 64.19(14.77) <sup>#</sup>         |
| Yes                          | 2446 | 67.92(12.25) <sup>*</sup>         | 62.64(13.97) <sup>*</sup>         | 57.71(15.84) <sup>*</sup>         |
| <b>Alcohol intake</b>        |      |                                   |                                   |                                   |
| Never                        | 2077 | 71.93(13.13) <sup>#^\$&amp;</sup> | 68.18(14.66) <sup>#^\$&amp;</sup> | 62.61(15.78) <sup>#^&amp;</sup>   |
| Occasionally                 | 3099 | 70.86(12.06) <sup>*^\$&amp;</sup> | 66.55(14.21) <sup>*&amp;</sup>    | 61.15(15.11) <sup>*&amp;</sup>    |
| Little everyday              | 421  | 68.85(13.65) <sup>*#&amp;</sup>   | 66.29(15.75) <sup>*&amp;</sup>    | 59.93(16.69) <sup>*&amp;</sup>    |
| Some everyday                | 106  | 68.35(12.88) <sup>*#&amp;</sup>   | 65.17(13.79) <sup>*&amp;</sup>    | 60.27(14.29) <sup>&amp;</sup>     |
| Much everyday                | 72   | 63.47(14.37) <sup>*#^\$</sup>     | 60.1(16.45) <sup>*#^\$</sup>      | 53.97(20.69) <sup>*#^\$</sup>     |
| <b>Breakfast consumption</b> |      |                                   |                                   |                                   |
| Never                        | 139  | 67.93(15.07) <sup>\$&amp;</sup>   | 62.4(17.25) <sup>\$&amp;</sup>    | 53.46(19.83) <sup>^\$&amp;</sup>  |
| Occasionally                 | 600  | 66.88(12.63) <sup>\$&amp;</sup>   | 62.69(14.12) <sup>\$&amp;</sup>   | 55.79(16.70) <sup>\$&amp;</sup>   |
| Sometimes                    | 830  | 68.03(11.99) <sup>\$&amp;</sup>   | 61.81(13.07) <sup>\$&amp;</sup>   | 56.37(15.38) <sup>*\$&amp;</sup>  |
| Frequently                   | 1539 | 71.07(11.94) <sup>*#^&amp;</sup>  | 66.48(14.01) <sup>*#^&amp;</sup>  | 61.75(14.52) <sup>*#^&amp;</sup>  |
| Everyday                     | 2671 | 72.91(12.73) <sup>*#^\$</sup>     | 70.22(14.46) <sup>*#^\$</sup>     | 64.69(14.75) <sup>*#^\$</sup>     |
| <b>Physical exercise</b>     |      |                                   |                                   |                                   |
| Never                        | 848  | 68.55(13.27) <sup>#^\$&amp;</sup> | 64.24(14.4) <sup>#^\$&amp;</sup>  | 58.21(15.68) <sup>#^\$&amp;</sup> |
| Occasionally                 | 2338 | 70.43(11.78) <sup>*\$&amp;</sup>  | 65.54(13.92) <sup>*^\$&amp;</sup> | 60.36(14.45) <sup>*^\$&amp;</sup> |
| Sometimes                    | 1373 | 71.26(13.11) <sup>*&amp;</sup>    | 67.54(14.53) <sup>*#&amp;</sup>   | 61.51(16.75) <sup>*#&amp;</sup>   |
| Frequently                   | 608  | 71.77(13.03) <sup>*#&amp;</sup>   | 68.72(14.85) <sup>*#^</sup>       | 64.57(15.24) <sup>*#^&amp;</sup>  |
| Everyday                     | 627  | 74.73(12.73) <sup>*#^\$</sup>     | 73.53(14.82) <sup>*#^\$</sup>     | 67.12(15.11) <sup>*#^\$</sup>     |
| <b>Early to bed</b>          |      |                                   |                                   |                                   |
| Never                        | 947  | 70.29(12.36) <sup>\$&amp;</sup>   | 64.8(14.74) <sup>\$&amp;</sup>    | 59.72(15.61) <sup>\$&amp;</sup>   |
| Occasionally                 | 1512 | 70.3(11.94) <sup>\$&amp;</sup>    | 65.57(13.71) <sup>\$&amp;</sup>   | 60.08(15.33) <sup>\$&amp;</sup>   |
| Sometimes                    | 1224 | 70.01(12.84) <sup>\$&amp;</sup>   | 65.84(14.46) <sup>*#&amp;</sup>   | 60.47(15.99) <sup>\$&amp;</sup>   |
| Frequently                   | 997  | 71.49(12.76) <sup>*#^&amp;</sup>  | 68.36(14.46) <sup>*#^&amp;</sup>  | 63.07(14.79) <sup>*#^&amp;</sup>  |
| Everyday                     | 1113 | 72.98(13.39) <sup>*#^\$</sup>     | 70.99(14.84) <sup>*#^\$</sup>     | 64.52(15.49) <sup>*#^\$</sup>     |
| <b>Sleep time</b>            |      |                                   |                                   |                                   |
| <3hours/day                  | 35   | 62.96(12.11) <sup>^\$&amp;</sup>  | 58.87(13.81) <sup>^\$&amp;</sup>  | 49.68(20.42) <sup>^\$&amp;</sup>  |
| <5hours/day                  | 145  | 62.44(12.88) <sup>^\$&amp;</sup>  | 56.97(14.78) <sup>^\$&amp;</sup>  | 48.51(18.88) <sup>^\$&amp;</sup>  |
| <7hours/day                  | 1377 | 67.89(12.34) <sup>*#&amp;</sup>   | 64.88(14.09) <sup>*#&amp;</sup>   | 59.86(15.83) <sup>*#&amp;</sup>   |
| <9hours/day                  | 3748 | 72.47(12.29) <sup>*#^&amp;</sup>  | 68.14(14.38) <sup>*#^</sup>       | 62.65(14.82) <sup>*#^</sup>       |
| ≥9hours/day                  | 492  | 71.09(13.67) <sup>*#^\$</sup>     | 68.15(15.30) <sup>*#^</sup>       | 61.95(16.59) <sup>*#^</sup>       |
| <b>Health knowledge</b>      |      |                                   |                                   |                                   |
| Very few                     | 1332 | 70.27(12.55) <sup>\$&amp;</sup>   | 65.17(14.79) <sup>^\$&amp;</sup>  | 58.31(15.43) <sup>#^\$&amp;</sup> |
| Few                          | 1794 | 70.38(12.51) <sup>\$&amp;</sup>   | 65.77(14.27) <sup>^\$&amp;</sup>  | 60.13(15.41) <sup>*^\$&amp;</sup> |
| General                      | 1913 | 70.71(12.52) <sup>\$&amp;</sup>   | 67.54(14.37) <sup>*#&amp;</sup>   | 62.55(15.13) <sup>*#&amp;</sup>   |

|                                    |                |      |                                   |                                     |                                     |
|------------------------------------|----------------|------|-----------------------------------|-------------------------------------|-------------------------------------|
|                                    | Much           | 628  | 74.11(12.58) <sup>*#^</sup>       | 71.47(13.79) <sup>*#^&amp;</sup>    | 67.2(14.62) <sup>*#^&amp;</sup>     |
|                                    | Very much      | 120  | 74.65(15.97) <sup>*#^</sup>       | 75.26(15.28) <sup>*#^\$</sup>       | 70.61(18.46) <sup>*#^\$</sup>       |
| Care for health                    |                |      |                                   |                                     |                                     |
|                                    | Very low       | 329  | 67.73(14.32) <sup>^\$&amp;</sup>  | 61.09(16.65) <sup>^\$&amp;</sup>    | 55.25(17.71) <sup>^\$&amp;</sup>    |
|                                    | Low            | 789  | 67.61(13.11) <sup>^\$&amp;</sup>  | 62.33(14.42) <sup>^\$&amp;</sup>    | 56.1(16.47) <sup>^\$&amp;</sup>     |
|                                    | General        | 2485 | 69.5(11.9) <sup>*#\$\$&amp;</sup> | 65.37(13.69) <sup>*#\$\$&amp;</sup> | 59.76(14.35) <sup>*#\$\$&amp;</sup> |
|                                    | High           | 1752 | 73.66(12) <sup>*#^&amp;</sup>     | 70.3(13.74) <sup>*#^&amp;</sup>     | 65.28(14.44) <sup>*#^&amp;</sup>    |
|                                    | Very high      | 437  | 76.86(13.36) <sup>*#^\$</sup>     | 76.27(14.12) <sup>*#^\$</sup>       | 70.57(15.73) <sup>*#^\$</sup>       |
| Effect of leisure promoting health |                |      |                                   |                                     |                                     |
|                                    | No effect      | 733  | 65.7(12.87) <sup>#^</sup>         | 60.94(14.56) <sup>#^</sup>          | 54.24(17.22) <sup>#^</sup>          |
|                                    | Some effect    | 3870 | 70.37(12.04) <sup>*^</sup>        | 66.1(13.76) <sup>*^</sup>           | 60.68(14.39) <sup>*^</sup>          |
|                                    | Very effective | 1163 | 76.39(12.75) <sup>*#</sup>        | 74.11(14.58) <sup>*#</sup>          | 69(15.28) <sup>*#</sup>             |

Transformed scores were analyzed here. Statistical analysis included a one-way ANOVA followed by LSD multiple comparisons test. \*:  $P < 0.05$  as compared to answer code 1; #:  $P < 0.05$  as compared to answer code 2; ^:  $P < 0.05$  as compared to answer code 3; \$:  $P < 0.05$  as compared to answer code 4, &:  $P < 0.05$  as compared to answer code 5.

Table 3 Influencing path of lifestyle and health consciousness on SHS

| SHS | Path way                                    | Mean standardized effects | 95%CI       |             | P-value |
|-----|---------------------------------------------|---------------------------|-------------|-------------|---------|
|     |                                             |                           | lower bound | upper bound |         |
| PS  |                                             |                           |             |             |         |
|     | Lifestyle—PS(total)                         | -0.329                    | -0.385      | -0.278      | <0.001  |
|     | Lifestyle—PS(direct)                        | -0.144                    | -0.209      | -0.081      | <0.001  |
|     | Lifestyle—Health consciousness—PS(indirect) | -0.185                    | -0.228      | -0.149      | <0.001  |
|     | Health consciousness—PS                     | 0.360                     | 0.295       | 0.427       | <0.001  |
| MS  |                                             |                           |             |             |         |
|     | Lifestyle—MS(total)                         | -0.370                    | -0.408      | -0.330      | <0.001  |
|     | Lifestyle—MS(direct)                        | -0.146                    | -0.201      | -0.094      | 0.001   |
|     | Lifestyle—Health consciousness—MS(indirect) | -0.224                    | -0.265      | -0.186      | <0.001  |
|     | Health consciousness—MS                     | 0.452                     | 0.392       | 0.510       | <0.001  |
| SS  |                                             |                           |             |             |         |
|     | Lifestyle—SS(total)                         | -0.345                    | -0.383      | -0.308      | <0.001  |
|     | Lifestyle—SS(direct)                        | -0.130                    | -0.181      | -0.077      | 0.001   |
|     | Lifestyle—Health consciousness—SS(indirect) | -0.216                    | -0.257      | -0.179      | <0.001  |
|     | Health consciousness—SS                     | 0.434                     | 0.376       | 0.490       | <0.001  |

PS = physical suboptimal health status, MS = mental suboptimal health status, SS = social suboptimal health status

1  
2  
3  
4 Figure 1. SEM model of lifestyle, health consciousness and PS (Model 1), MS (Model  
5 2), or SS (Model 3). All the standardized regression coefficients are presented as  
6 single-headed arrows, and statistically significant at 0.05 significance level.  
7  
8 Abbreviations: PS= physical sub-health status, MS=mental sub-health status,  
9  
10 SS=social sub-health status.  
11  
12  
13  
14  
15  
16  
17  
18  
19  
20  
21  
22  
23  
24  
25  
26  
27  
28  
29  
30  
31  
32  
33  
34  
35  
36  
37  
38  
39  
40  
41  
42  
43  
44  
45  
46  
47  
48  
49  
50  
51  
52  
53  
54  
55  
56  
57  
58  
59  
60

For peer review only

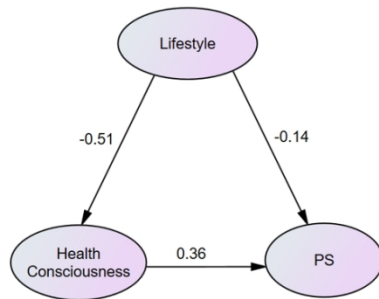

CMIN/DF=7.922, CFI=0.962,  
GFI=0.981, AGFI=0.967,  
RMSEA=0.035

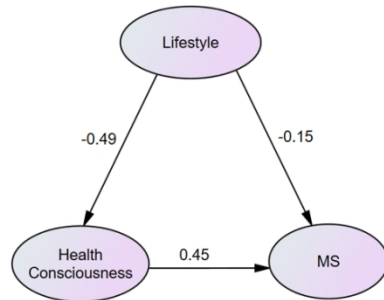

CMIN/DF=5.583, CFI=0.982,  
GFI=0.988, AGFI=0.978,  
RMSEA=0.028

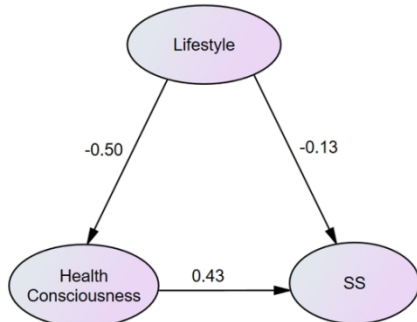

CMIN/DF=4.957, CFI=0.985,  
GFI=0.990, AGFI=0.983,  
RMSEA=0.026

**Figure 1.** SEM model of lifestyle, health consciousness and PS (Model 1), MS (Model 2), or SS (Model 3). All the standardized regression coefficients are presented as single-headed arrows, and statistically significant at 0.05 significance level. Abbreviations: PS= physical sub-health status, MS=mental sub-health status, SS=social sub-health status.

SEM model of lifestyle, health consciousness and PS (Model 1), MS (Model 2), or SS (Model 3). All the standardized regression coefficients are presented as single-headed arrows, and statistically significant at 0.05 significance level. Abbreviations: PS= physical sub-health status, MS=mental sub-health status, SS=social sub-health status.



STROBE Statement—Checklist of items that should be included in reports of *cross-sectional studies*

|                              | Item No | Recommendation                                                                                                                                                                                    | Page No        |
|------------------------------|---------|---------------------------------------------------------------------------------------------------------------------------------------------------------------------------------------------------|----------------|
| <b>Title and abstract</b>    | 1       | (a) Indicate the study's design with a commonly used term in the title or the abstract                                                                                                            | 1              |
|                              |         | (b) Provide in the abstract an informative and balanced summary of what was done and what was found                                                                                               | 2-3            |
| <b>Introduction</b>          |         |                                                                                                                                                                                                   |                |
| Background/rationale         | 2       | Explain the scientific background and rationale for the investigation being reported                                                                                                              | 4-6            |
| Objectives                   | 3       | State specific objectives, including any prespecified hypotheses                                                                                                                                  | 6              |
| <b>Methods</b>               |         |                                                                                                                                                                                                   |                |
| Study design                 | 4       | Present key elements of study design early in the paper                                                                                                                                           | 6              |
| Setting                      | 5       | Describe the setting, locations, and relevant dates, including periods of recruitment, exposure, follow-up, and data collection                                                                   | 6              |
| Participants                 | 6       | (a) Give the eligibility criteria, and the sources and methods of selection of participants                                                                                                       | 6              |
| Variables                    | 7       | Clearly define all outcomes, exposures, predictors, potential confounders, and effect modifiers. Give diagnostic criteria, if applicable                                                          | 7-9            |
| Data sources/<br>measurement | 8*      | For each variable of interest, give sources of data and details of methods of assessment (measurement). Describe comparability of assessment methods if there is more than one group              | 7-9            |
| Bias                         | 9       | Describe any efforts to address potential sources of bias                                                                                                                                         | 9              |
| Study size                   | 10      | Explain how the study size was arrived at                                                                                                                                                         | 6              |
| Quantitative variables       | 11      | Explain how quantitative variables were handled in the analyses. If applicable, describe which groupings were chosen and why                                                                      | 8-9            |
| Statistical methods          | 12      | (a) Describe all statistical methods, including those used to control for confounding                                                                                                             | 9-10           |
|                              |         | (b) Describe any methods used to examine subgroups and interactions                                                                                                                               | Not applicable |
|                              |         | (c) Explain how missing data were addressed                                                                                                                                                       | 10             |
|                              |         | (d) If applicable, describe analytical methods taking account of sampling strategy                                                                                                                | Not applicable |
|                              |         | (e) Describe any sensitivity analyses                                                                                                                                                             | Not applicable |
| <b>Results</b>               |         |                                                                                                                                                                                                   |                |
| Participants                 | 13*     | (a) Report numbers of individuals at each stage of study—eg numbers potentially eligible, examined for eligibility, confirmed eligible, included in the study, completing follow-up, and analysed | 10             |
|                              |         | (b) Give reasons for non-participation at each stage                                                                                                                                              | Not applicable |
|                              |         | (c) Consider use of a flow diagram                                                                                                                                                                | Not applicable |
| Descriptive data             | 14*     | (a) Give characteristics of study participants (eg demographic, clinical, social) and information on exposures and potential confounders                                                          | 10             |

|                          |     |                                                                                                                                                                                                              |                |
|--------------------------|-----|--------------------------------------------------------------------------------------------------------------------------------------------------------------------------------------------------------------|----------------|
|                          |     | (b) Indicate number of participants with missing data for each variable of interest                                                                                                                          | 21             |
| Outcome data             | 15* | Report numbers of outcome events or summary measures                                                                                                                                                         | 10-12          |
| Main results             | 16  | (a) Give unadjusted estimates and, if applicable, confounder-adjusted estimates and their precision (eg, 95% confidence interval). Make clear which confounders were adjusted for and why they were included | 10-12, 22-24   |
|                          |     | (b) Report category boundaries when continuous variables were categorized                                                                                                                                    | Not applicable |
|                          |     | (c) If relevant, consider translating estimates of relative risk into absolute risk for a meaningful time period                                                                                             | Not applicable |
| Other analyses           | 17  | Report other analyses done—eg analyses of subgroups and interactions, and sensitivity analyses                                                                                                               | Not applicable |
| <b>Discussion</b>        |     |                                                                                                                                                                                                              |                |
| Key results              | 18  | Summarise key results with reference to study objectives                                                                                                                                                     | 12-13          |
| Limitations              | 19  | Discuss limitations of the study, taking into account sources of potential bias or imprecision. Discuss both direction and magnitude of any potential bias                                                   | 14             |
| Interpretation           | 20  | Give a cautious overall interpretation of results considering objectives, limitations, multiplicity of analyses, results from similar studies, and other relevant evidence                                   | 12-14          |
| Generalisability         | 21  | Discuss the generalisability (external validity) of the study results                                                                                                                                        | 12-13          |
| <b>Other information</b> |     |                                                                                                                                                                                                              |                |
| Funding                  | 22  | Give the source of funding and the role of the funders for the present study and, if applicable, for the original study on which the present article is based                                                | 15             |

\*Give information separately for exposed and unexposed groups.

**Note:** An Explanation and Elaboration article discusses each checklist item and gives methodological background and published examples of transparent reporting. The STROBE checklist is best used in conjunction with this article (freely available on the Web sites of PLoS Medicine at <http://www.plosmedicine.org/>, Annals of Internal Medicine at <http://www.annals.org/>, and Epidemiology at <http://www.epidem.com/>). Information on the STROBE Initiative is available at [www.strobe-statement.org](http://www.strobe-statement.org).

# BMJ Open

## Mediating effect of health consciousness in the relationship of lifestyle and suboptimal health status: A cross-sectional study involving Chinese urban residents

|                                 |                                                                                                                                                                                                                                                                                                                                                                                                                                                                                                                                                                                                                                                             |
|---------------------------------|-------------------------------------------------------------------------------------------------------------------------------------------------------------------------------------------------------------------------------------------------------------------------------------------------------------------------------------------------------------------------------------------------------------------------------------------------------------------------------------------------------------------------------------------------------------------------------------------------------------------------------------------------------------|
| Journal:                        | <i>BMJ Open</i>                                                                                                                                                                                                                                                                                                                                                                                                                                                                                                                                                                                                                                             |
| Manuscript ID                   | bmjopen-2020-039701.R2                                                                                                                                                                                                                                                                                                                                                                                                                                                                                                                                                                                                                                      |
| Article Type:                   | Original research                                                                                                                                                                                                                                                                                                                                                                                                                                                                                                                                                                                                                                           |
| Date Submitted by the Author:   | 03-Oct-2020                                                                                                                                                                                                                                                                                                                                                                                                                                                                                                                                                                                                                                                 |
| Complete List of Authors:       | xue, yunlian; Guangdong Provincial People's Hospital, Statistics Section<br>liu, guihao; Guangdong Provincial People's Hospital, General Committee Office<br>Feng, Yefang; Southern Medical University Nanfang Hospital, Sanitation Economy Administration<br>Xu, Mengyao ; Southern Medical University Nanfang Hospital, Sanitation Economy Administration<br>Jiang, Lijie ; Southern Medical University Nanfang Hospital, Sanitation Economy Administration<br>Lin, Yuanqi ; Southern Medical University Nanfang Hospital, Sanitation Economy Administration<br>Xu, Jun ; Southern Medical University Nanfang Hospital, Sanitation Economy Administration |
| <b>Primary Subject Heading</b>: | Health policy                                                                                                                                                                                                                                                                                                                                                                                                                                                                                                                                                                                                                                               |
| Secondary Subject Heading:      | Public health                                                                                                                                                                                                                                                                                                                                                                                                                                                                                                                                                                                                                                               |
| Keywords:                       | Public health < INFECTIOUS DISEASES, Health policy < HEALTH SERVICES ADMINISTRATION & MANAGEMENT, Risk management < HEALTH SERVICES ADMINISTRATION & MANAGEMENT                                                                                                                                                                                                                                                                                                                                                                                                                                                                                             |
|                                 |                                                                                                                                                                                                                                                                                                                                                                                                                                                                                                                                                                                                                                                             |

SCHOLARONE™  
Manuscripts



I, the Submitting Author has the right to grant and does grant on behalf of all authors of the Work (as defined in the below author licence), an exclusive licence and/or a non-exclusive licence for contributions from authors who are: i) UK Crown employees; ii) where BMJ has agreed a CC-BY licence shall apply, and/or iii) in accordance with the terms applicable for US Federal Government officers or employees acting as part of their official duties; on a worldwide, perpetual, irrevocable, royalty-free basis to BMJ Publishing Group Ltd ("BMJ") its licensees and where the relevant Journal is co-owned by BMJ to the co-owners of the Journal, to publish the Work in this journal and any other BMJ products and to exploit all rights, as set out in our [licence](#).

The Submitting Author accepts and understands that any supply made under these terms is made by BMJ to the Submitting Author unless you are acting as an employee on behalf of your employer or a postgraduate student of an affiliated institution which is paying any applicable article publishing charge ("APC") for Open Access articles. Where the Submitting Author wishes to make the Work available on an Open Access basis (and intends to pay the relevant APC), the terms of reuse of such Open Access shall be governed by a Creative Commons licence – details of these licences and which [Creative Commons](#) licence will apply to this Work are set out in our licence referred to above.

Other than as permitted in any relevant BMJ Author's Self Archiving Policies, I confirm this Work has not been accepted for publication elsewhere, is not being considered for publication elsewhere and does not duplicate material already published. I confirm all authors consent to publication of this Work and authorise the granting of this licence.

1  
2  
3 Mediating effect of health consciousness in the relationship of lifestyle  
4  
5  
6 and suboptimal health status: A cross-sectional study involving Chinese  
7  
8  
9 urban residents  
10

11  
12  
13  
14 Yunlian Xue<sup>1,2,3</sup>, Guihao Liu<sup>2</sup>, Yefang Feng<sup>1</sup>, Mengyao Xu<sup>1</sup>, Lijie Jiang<sup>1</sup>, Yuanqi Lin<sup>1</sup>,  
15  
16 Jun Xu<sup>1\*</sup>  
17

18  
19  
20  
21 <sup>1</sup> Department of Sanitation Economy Administration, Nanfang Hospital, Southern  
22  
23 Medical University, Guangzhou, Guangdong Province, PR China  
24

25  
26 <sup>2</sup> Guangdong Provincial People's Hospital (Guangdong Academy of Medical  
27  
28 Sciences), Guangzhou, Guangdong Province, PR China  
29

30  
31 <sup>3</sup> School of Public Health, Southern Medical University, Guangzhou, Guangdong  
32  
33 Province, PR China  
34

35  
36  
37  
38  
39  
40  
41  
42 \* Correspondence: Jun Xu  
43

44 Department of Sanitation Economy Administration, Nanfang Hospital, Southern  
45  
46 Medical University, Guangzhou, Guangdong Province, PR China  
47

48 Email: drugstat@163.com  
49

50 Telephone: +86-020-61641888  
51  
52  
53  
54  
55  
56  
57  
58  
59  
60

## ABSTRACT

**Objective:** *Suboptimal health status* (SHS), a third state between good health and disease, can easily develop into chronic diseases, and can be influenced by lifestyle and health consciousness. No study has surveyed the intermediation of health consciousness on the relationship between lifestyle and SHS. This study aimed to analyze the association of lifestyle and SHS, and intermediation of health consciousness in Chinese urban residents.

**Design:** A cross-sectional face-to-face survey using a four-stage stratified sampling method.

**Participants:** We investigated 5,803 Chinese urban residents aged 18 years and over. We measured SHS using the Sub-Health Measurement Scale V1.0. We adopted a structural equation model (SEM) to analyze relationships among lifestyle, health consciousness, and SHS. We applied a bootstrapping method to estimate the mediation effect of health consciousness.

**Results:** Lifestyle had stronger indirect associations with physical ( $\beta$  -0.185, 95% CI -0.228 to -0.149), mental ( $\beta$  -0.224, 95% CI -0.265 to -0.186) and social SHS ( $\beta$  -0.216, 95% CI -0.257 to -0.179) via health consciousness than direct associations of physical ( $\beta$  -0.144, 95% CI -0.209 to -0.081), mental ( $\beta$  -0.146, 95% CI -0.201 to -0.094), and social SHS ( $\beta$  -0.130, 95% CI -0.181 to -0.077). Health consciousness has a strong direct association with physical ( $\beta$  0.360, 95% CI 0.295 to 0.427), mental ( $\beta$  0.452, 95% CI 0.392 to 0.510), and social suboptimal health ( $\beta$  0.434, 95% CI 0.376 to 0.490). Ratio of mediating effect of health consciousness to direct effect of lifestyle with physical, mental, and social SHS was 1.28, 1.53, and 1.66, respectively.

**Conclusions:** Health consciousness was more important in preventing physical, mental, and social SHS than lifestyle. Therefore, it might be useful in changing

1  
2  
3 unhealthy lifestyle and reducing the influence of poor lifestyle on physical, mental  
4 and social SHS.  
5  
6

### 7 **Strengths and limitations of this study**

- 10 • The participants, who were recruited through a cross-sectional survey using a  
11 four-stage stratified sampling method, were representative of Chinese urban  
12 residents.  
13  
14
- 15 • To the best of our knowledge, this is the first representative analysis of the  
16 mediating effect of health consciousness on the association of lifestyle with  
17 physical, mental, and social SHS.  
18  
19
- 20 • Although we used a four-stage stratified sampling method, sampling errors are  
21 still inevitable.  
22  
23
- 24 • This study only included the seven most common lifestyle factors.  
25  
26  
27  
28  
29

30  
31 **Keywords:** Suboptimal health status, Lifestyle, Health consciousness, Urban  
32 residents, China  
33  
34  
35  
36  
37  
38  
39  
40  
41  
42  
43  
44  
45  
46  
47  
48  
49  
50  
51  
52  
53  
54  
55  
56  
57  
58  
59  
60

## INTRODUCTION

In 1946, the World Health Organization (WHO) <sup>1</sup> defined health as “a state of complete physical, mental, and social well-being and not merely the absence of disease or infirmity.” It is reported that non-communicable diseases (NCDs) account for an estimated 80% of the total deaths and 70% of the total number of disability-adjusted life-years (DALYs) in the early twentieth century.<sup>2</sup> Moreover, NCD increase steadily with urbanization and aging, <sup>3</sup> being attributed with more than 88% of total deaths in China in 2019.<sup>4</sup> Furthermore, a study pointed out that NCDs accounted for 18 of the 20 leading causes of age-standardized years lived with disability on a global scale.<sup>5</sup> The preclinical status of NCDs and its early detection have become major issues in the promotion of basic health service in the reform of health care.<sup>6</sup>

*Suboptimal health status* (SHS), an intermediate status between chronic disease and health, is believed to be a subclinical and reversible stage of chronic disease.<sup>7</sup> People in SHS, although without a diagnosable condition, are characterized by a decline in vitality and physiological function, ambiguous health complaints, general weakness, and lack of vitality. In fact, it has become a new public health challenge in China.<sup>8,9</sup>

It is reported that SHS can be measured objectively using microbiome,<sup>10</sup> telomere length,<sup>11</sup> plasma stress hormones,<sup>12</sup> plasma metabolites,<sup>13</sup> and glycan.<sup>14</sup> However, these objective measures are not easily accessible, and sometimes may not be obvious, especially when people have uncomfortable feelings without abnormal symptoms. A self-rated method that uses a questionnaire is widely applicable in assessing SHS. In China, the sub-health measurement scale (SHMS V1.0), suboptimal health status questionnaire (SHSQ-25)<sup>15</sup> and Chinese sub-health scale (CSHES)<sup>16</sup> were widely used for assessing SHS. However, compared to the other questionnaires, SHMS V1.0



1  
2  
3 assesses of the physical, mental, and social aspects of SHS, which is in accordance  
4  
5 with the health concept proposed by WHO in 1947.  
6

7  
8 SHS has a prevalence of above 65% in China,<sup>17-20</sup> and has become an increasingly  
9  
10 concerning problem in many countries.<sup>21 22</sup> Moreover, its prevalence may be severely  
11  
12 underestimated since many individuals are not aware that they suffer from SHS. For  
13  
14 instance, in an investigation involving 6,000 Chinese self-reported “healthy people,”  
15  
16 72.8% were in “suboptimal health status.”<sup>23</sup> Thus, identifying the influencing factors  
17  
18 of SHS is important in preventing it, and would provide important information for  
19  
20 first-level prevention of NCD<sup>24</sup>. In accordance with the definition released by the  
21  
22 WHO, SHS has three dimensions: physical, mental and social adaption.<sup>25</sup> SHS  
23  
24 concept is mainly based on Transitional Chinese Medicine (TCM) and prevention is  
25  
26 important<sup>26 27</sup>.  
27  
28  
29

30  
31 Lifestyle is an important factor associated with SHS. This includes smoking,  
32  
33 alcohol use, skipping breakfast, poor nutrition, lack of exercise, and sleep problems.<sup>28</sup>  
34  
35 <sup>29</sup> The first SHS study on urban Chinese population<sup>9</sup> pointed that SHS was associated  
36  
37 with risk factors of chronic diseases and contributed to the development of them. In  
38  
39 SHS, individuals can prevent a chronic disease by modifying their poor lifestyles, as  
40  
41 supported by China's Blue Book on Self-Care.<sup>30</sup> Although, it is a given fact that  
42  
43 individuals ought to change their bad lifestyles when experiencing adverse health  
44  
45 issues, this is difficult to achieve in practice.<sup>31 32</sup> Studies revealed that better  
46  
47 knowledge and strong beliefs improve the adherence to lifestyle changes<sup>33 34</sup> and  
48  
49 prevent and control chronic diseases;<sup>35 36</sup> better knowledge and strong beliefs are  
50  
51 important expressions of health consciousness.  
52  
53  
54

55  
56 *Health consciousness* is a psychological construct that corresponds to the  
57  
58 awareness about one's health, and the willingness to change one's behaviors in order  
59  
60

1  
2  
3 to improve it.<sup>37 38</sup> Moreover, it is related to anxiety, stress, depression, and  
4 non-treatable diseases.<sup>39</sup> However, to our knowledge, there are no studies on the  
5 association of health consciousness to SHS. People may present different suboptimal  
6 health states in their physical, mental, and social adaptation; thus, it is necessary to  
7 analyze SHS separately. We aimed to investigate whether improved health  
8 consciousness is associated with better lifestyle and less physical, mental and social  
9 SHS. Moreover, we aimed to discover the possible mediating effect of health  
10 consciousness on the association of lifestyle with physical, mental, and social SHS.  
11 Thus, we used structural equation models to clarify these questions, on the basis of a  
12 representative sample of Chinese urban residents.

## 13 **METHODS**

### 14 **Study design and population**

15 We conducted a cross-sectional survey using a four-stage stratified sampling method  
16 from December 2017 to October 2018. In the first stage, we chose one province each  
17 from five administrative divisions in China; we selected Guangdong province,  
18 Heilongjiang province, Sichuan province, Gansu province, and Tianjin city. Second,  
19 we chose three to four cities from each province by considering their level of  
20 economic development and regional distribution. Subsequently, we randomly selected  
21 two to four streets in the selected urban areas. Lastly, we investigated the urban  
22 residents who conveniently qualified from each street.

23 This study included individuals aged 18 years and older, who lived in an urban area  
24 for more than six months, and volunteered in our investigation. We excluded  
25 individuals who had a confirmed disease in the last two months, were unable to  
26 complete the questionnaire due to visual or hearing impairment, and with missing  
27 values in lifestyle, health consciousness, and SHS items. We investigated a total of  
28

1  
2  
3 6,578 individuals and excluded 775. Thus, we analyzed a total of 5,803 urban  
4  
5 residents. Among them, 1,704, 1,328, 954, 925, and 892 participants were from  
6  
7 Guangdong, Heilongjiang, Sichuan, Gansu, and Tianjin provinces, respectively. All  
8  
9 participants that volunteered provided their verbal consent prior to data collection, and  
10  
11 were given the option to cease from participating anytime. They were also invited to  
12  
13 give advices regarding the questionnaire. This study was approved by Medical Ethics  
14  
15 committee of Nanfang Hospital of Southern Medical University (No.  
16  
17 NFEC-2019-196). All data were kept strictly confidential.  
18  
19  
20  
21

### 22 **Patient and Public Involvement**

23  
24 The participants were not involved in the development of the research question or  
25  
26 design of this study. However, we disseminated the results of this analysis through  
27  
28 public conferences, including summarized statements and open access to the  
29  
30 published reports.  
31  
32

### 33 **Survey instrument**

34  
35 We used a self-designed questionnaire for investigation, which is comprised of four  
36  
37 parts: general demographic characteristics, which included age, gender, marital status,  
38  
39 highest education level, per capita monthly household income, and insurance; lifestyle,  
40  
41 which included smoking, bad diet habit, alcohol intake, breakfast consumption,  
42  
43 physical exercise, early to bed (before 11 pm), and sleep time; health consciousness,  
44  
45 which included health knowledge, care for health, and effect of leisure promoting  
46  
47 health; and sub-health measurement scale (SHMS) V1.0. Each volunteer completed  
48  
49 the questionnaire within 30 minutes. Verbal consents were deemed to be sufficient  
50  
51 because the participants had volunteered for the study and could refuse to take part if  
52  
53 they wished. The objective of the survey was to study the health status of the  
54  
55 participants rather than intervene. All data were kept strictly confidential. The ethics  
56  
57  
58  
59  
60

1  
2  
3 committee approved the consent procedure.  
4

### 5 **SHS assessment**

6  
7 We performed suboptimal health status assessment using SHMS V1.0, which was  
8 developed by our research group. It comprised of 39 items<sup>25</sup> that were proven to have  
9 high reliability and validity in a Chinese population.<sup>40</sup> SHMS V1.0 consists of three  
10 subscales: physical suboptimal health status (PS), mental suboptimal health status  
11 (MS), and social suboptimal health status (SS). PS consists of 14 items that comprises  
12 four factors: physical condition, organ function, body movement function, and vigor.  
13 MS consists of 12 items that comprises three factors: positive emotion, psychological  
14 symptoms, and cognitive function. SS consists of nine items that comprises three  
15 factors: social adjustment, social resources, and social support. For each item, there  
16 are five response categories (1=*none*, 2=*occasionally*, 3=*sometimes*, 4=*constantly*,  
17 and 5=*always*) that correspond to the frequency of occurrence of each symptom. We  
18 asked the participants regarding the uncomfortable symptoms that they had during the  
19 previous month. We then calculated the total scores. A low total score represents a  
20 low estimate of SHS (i.e., poor health). The cut-off value for suboptimal health  
21 assessment referred to norms of SHMS V1.0 for Chinese urban residents were  
22 established by our research group.<sup>41</sup>  
23  
24  
25  
26  
27  
28  
29  
30  
31  
32  
33  
34  
35  
36  
37  
38  
39  
40  
41  
42  
43  
44

### 45 **Lifestyle evaluation**

46 Smoking was comprised of none smokers, past smokers, and current smokers. Bad  
47 diet habit was divided into “yes” (if any one of the following seven situations exist:  
48 irregular eating time, dieting, overeating, dietary bias or pickiness, salty tasty, spicy  
49 tasty, and using snacks instead of meals), and “no”. Alcohol intake was divided into  
50 “never,” “occasionally,” “little everyday,” and “much everyday.” Breakfast  
51 consumption was comprised of “never,” “occasionally” (i.e., one or two days a week),  
52  
53  
54  
55  
56  
57  
58  
59  
60

1  
2  
3 “sometimes” (i.e., three or four days a week), “frequently” (i.e., five or six days a  
4 week), and “everyday.” Physical exercise was divided into “everyday,” “frequently”  
5 (i.e., five or six days a week), “sometimes” (i.e., three or four days a week), and  
6 “occasionally” (i.e., one or two days a week, and no physical exercise). Sleep time  
7 were divided into three groups, “<7hours/day,” “7-9hours/day,” and “≥9hours/day.”

### 15 **Health consciousness evaluation**

16 Health knowledge and attention to health consisted of “very few/low,” “few/low,”  
17 “general,” “much/high,” and “very much/high.” Effect of leisure on health consisted  
18 of “no effect,” “some effect,” and “very effective.”

### 24 **Quality control and Data management**

25 The investigators for each site were trained through face-to-face, video conferencing,  
26 and telephone. Before the conduct of the investigation, we made sure that its purpose  
27 and importance were explained to the participants in detail, and obtained their  
28 verbal informed consent. The respondents answered the questionnaires independently  
29 and according to their own understanding, while missing data were re-answered after  
30 checking by the investigators. Before data coding and entry, suspicious duplicate  
31 questionnaires, which are those with a repetition rate higher than 80% and completion  
32 rate lower than 80% were excluded. All questionnaire data were double-entered using  
33 Epidata 3.1 software. The two data sets were cross compared for validity and errors.

### 47 **Statistical analysis**

48 Description was using means (standard deviations) and proportions. We used a  
49 one-way ANOVA with LSD-test for multiple comparisons. Cluster effect nested  
50 within sampling regions was examined by using interclass correlation coefficient  
51 (ICC) calculated in a two-level linear multilevel model. We used structural equation  
52 modeling (SEM) to analyze the complexity of associations between lifestyle, health  
53  
54  
55  
56  
57  
58  
59  
60

1  
2  
3 consciousness, and SHS (Model 1: SEM model of lifestyle, health consciousness, and  
4 PS; Model 2: SEM model of lifestyle, health consciousness, and MS; Model 3: SEM  
5 model of lifestyle, health consciousness, and SS). Mediating effect of health  
6 consciousness was the same with indirect association of lifestyle and SHS via health  
7 consciousness. Ratio of mediating effect of health consciousness to direct effect of  
8 lifestyle (indirect effect divided by direct effect) and proportion of mediating effect of  
9 health consciousness to total effect (indirect effect divided by total effect multiply by  
10 a hundred) of lifestyle with physical, mental, and social SHS were also calculated. We  
11 used the relative  $\chi^2$  (CMIN/DF), root mean-square error of approximation (RMSEA),  
12 comparative fit index (CFI), goodness-of-fit index (GFI), and adjusted goodness-of-fit  
13 index (AGFI) to assess the model fit. We applied the bootstrapping method of repeat  
14 sampling by 2,000 times to verify statistical significance and calculate the confidence  
15 intervals for the direct, indirect, and total effects. Participants with missing data were  
16 deleted from analysis. All *P*-values were two sided, with values < 0.05 considered as  
17 statistically significant. We used IBM SPSS Statistics 20.0 for descriptive analysis.  
18 Lastly, we conducted SEM analysis with AMOS (SPSS Statistics version 20-0, SPSS  
19 Inc., Chicago, IL).

## 20 RESULTS

### 21 Participants' demographic characteristics

22 Baseline characteristics of all study participants are presented in Table 1. Of the 5,803  
23 participants, 2,772 (47.77%) were men and 3,031 (52.23%) were women. The mean  
24 age was 40.90±15.46 years. Most of the participants (65.98%) were married.  
25 Moreover, 1,939 (57.21%) of the participants have a per capita monthly household  
26 income (RMB) of less than 5,000 RMB. Participants with compulsory school (up to  
27 grade 9), high school, junior college, and university degree and above were 1,341  
28

1  
2  
3 (23.1%), 1,298 (22.4%), 1,374 (23.7%) and 1,786 (30.8%), respectively.  
4  
5

### 6 **Association of lifestyle, health consciousness, and SHS**

7  
8 The mean (*SD*) of the overall SHS, PS, MS and SS transformed scores were 67.15  
9 (11.99), 70.92 (12.67), 67.01 (14.55), and 61.46 (15.56), respectively. The ANOVA  
10 results showed that various groups of lifestyle and health consciousness differed on  
11 physical SHS, mental SHS, and social SHS (Table 2). People who never smoked had  
12 the highest physical and social SHS scores; however, participants who quit smoking  
13 had lower physical, mental, and social SHS scores than participants who were still  
14 smoking. People who had bad diet habits and consumed the most alcohol had the  
15 lowest physical, mental, and social SHS scores. Physical, mental, and social SHS  
16 scores were higher for participants who regularly consumed breakfast, engaged in  
17 regular physical exercise, had early bedtimes (i.e., before 11 P.M.), and longer sleep  
18 duration.  
19  
20  
21  
22  
23  
24  
25  
26  
27  
28  
29  
30  
31  
32

### 33 **SEM analysis of lifestyle, health consciousness, and SHS**

34 Because we used the multi-stage sampling method in this study, there might be a  
35 cluster effect nested within sampling regions. We examined ICC and its significance  
36 using a two-level linear multilevel model. For physical, mental, and social SHS, there  
37 was no cluster effect in the regions, while the ICC was 0.028, 0.01, and 0.035, with *P*  
38 values of 0.085, 0.103, and 0.084, respectively. Thus, traditional SEM models could  
39 be used in the analysis of the association of lifestyle, health consciousness, and SHS  
40 (Figure 1). Three models fit reasonably well to the data. As shown in the models: (1)  
41 all indicator variables that we hypothesized as predictors were significantly related to  
42 their respective latent factors, *P* < 0.001; (2) lifestyle had a direct negative association  
43 with PS ( $\beta$  -0.14, *P* < 0.001), MS ( $\beta$  -0.15, *P* < 0.001) and SS ( $\beta$  -0.13, *P* 0.001); (3)  
44 health consciousness had direct positive association with PS ( $\beta$  0.36, *P* < 0.001), MS  
45  
46  
47  
48  
49  
50  
51  
52  
53  
54  
55  
56  
57  
58  
59  
60

( $\beta$  0.452,  $P < 0.001$ ), and SS ( $\beta$  0.434,  $P < 0.001$ ), and mediating effects on the association of lifestyle with PS, MS and SS.

The association paths of lifestyle and health consciousness on SHS are presented in Table 3. Although lifestyle and health consciousness were both associated with SHS, health consciousness had larger associations with PS ( $\beta$  0.360), MS ( $\beta$  0.452), and SS ( $\beta$  0.434) than lifestyle ( $\beta$  -0.329, -0.370, and -0.345 respectively). Association of lifestyle and PS could be direct ( $\beta$  -0.144, 95% CI -0.209 to -0.081)) and indirect ( $\beta$  -0.185, 95% CI -0.228 to -0.149), with faintly larger indirect association than direct association. However, the indirect association ( $\beta$  -0.224, 95% CI -0.265 to -0.186) of lifestyle and MS was obviously higher than direct association ( $\beta$  -0.146, 95% CI -0.201 to -0.094). The same higher indirect association ( $\beta$  -0.216, 95% CI -0.257 to -0.179) was found in the association of lifestyle and SS than direct association ( $\beta$  -0.130, 95% CI -0.181 to -0.077). Ratio of mediating effect of health consciousness to direct effect of lifestyle with physical, mental, and social SHS was 1.28, 1.53, and 1.66, respectively. Proportion of mediating effect of health consciousness to total effect of lifestyle with physical, mental, and social SHS was 56.23%, 60.54%, and 62.61%, respectively.

## DISCUSSION

In this large cross-sectional study involving a representative sample, we found that lifestyle health consciousness showed significantly mediating effects on the association of lifestyle with PS, MS and SS. The direct associations of PS, MS, and SS with health consciousness were all significantly higher than lifestyle. However, the indirect associations of lifestyle with PS, MS and SS were higher than indirect associations via health consciousness.

SHS is a subjective feeling that lacks objective clinical diagnostics; thus, a



1  
2  
3 self-assessed questionnaire is the most appropriate method of determining it. SHMS  
4  
5 V1.0 is a multidimensional scale that includes physical, mental, and social dimensions  
6  
7 that correspond to the WHO's more comprehensive definition of health.<sup>42</sup> Moreover,  
8  
9 it is widely used in China for assessing SHS in urban residents, workers and  
10  
11 students.<sup>17 18 25 29</sup> We found that Chinese urban residents had low scores in PS, MS  
12  
13 and SS, which means that they are at high risk to SHS in physical, mental, and social  
14  
15 adaption. This result is in accordance with other studies involving young and  
16  
17 middle-aged intellectuals in Guangzhou,<sup>43</sup> Chinese migrant workers,<sup>44</sup> and those that  
18  
19 use other SHS evaluation questionnaires in China, such as the SHSQ-25.<sup>6 9</sup> Similarly,  
20  
21 African<sup>14</sup> and Caucasian<sup>45</sup> studies showed the same SHS rate.  
22  
23  
24  
25

26  
27 To the best of our knowledge, this is the first representative analysis of the  
28  
29 mediating effect of health consciousness on the association of lifestyle with physical,  
30  
31 mental and social SHS. All variables included in lifestyle and health consciousness  
32  
33 were accordingly significantly associated. Urban residents who engage in unhealthy  
34  
35 lifestyle practices, such as smoking, alcohol intake, bad diet habits, irregular breakfast  
36  
37 consumption, less physical exercises, less frequent early to bed, and short sleep time  
38  
39 were more likely to get into PS, MS and SS. A study<sup>42</sup> revealed that breakfast eating  
40  
41 habits are significantly associated with lifestyle, and appear to be a useful predictor of  
42  
43 a healthy lifestyle; people who skip breakfast are prone to unhealthy behaviors, such  
44  
45 as limited exercise.<sup>46</sup> Moreover, insufficient sleep is associated with several  
46  
47 health-risk behaviors,<sup>47</sup> such as not meeting physical activity recommendations,<sup>48</sup>  
48  
49 using cigarettes and alcohol, and feeling sad or hopeless.<sup>49</sup> Furthermore, poor diet  
50  
51 was the third greatest influencing factor for physical and social health, which was in  
52  
53 line with previous studies.<sup>50 51</sup>  
54  
55  
56  
57

58 This study investigated the significant associations of health consciousness with PS,  
59  
60

1  
2  
3 MS, and SS, which were relatively more significant than those of lifestyle. Moreover,  
4  
5 in this study, health consciousness, included health knowledge, attention to health,  
6  
7 and effect of leisure on health. As the internal power of healthy behavior, health  
8  
9 consciousness is the most important and fundamental factor in promoting health. In  
10  
11 fact, individuals who had more health knowledge believed that they had control over  
12  
13 their health.<sup>52</sup>  
14  
15

16  
17 The most important finding was that health consciousness played a mediating effect  
18  
19 in the relationship of lifestyle with physical, mental and social SHS, which was higher  
20  
21 than direct effect of lifestyle. Studies have shown that health consciousness is  
22  
23 correlated with health behavior, information seeking and health coping.<sup>53</sup> Modifying  
24  
25 the attitudes is effective in promoting changes in health behavior,<sup>54</sup> since  
26  
27 health-conscious people are attentive to health warnings regarding the risks of having  
28  
29 an unhealthy lifestyle.<sup>55</sup>  
30  
31

### 32 33 **Limitations**

34  
35 This study has some limitations. First, although we used face-to-face interviews, all  
36  
37 data were collected from a respondent-completed questionnaire; thus, responses may  
38  
39 have a level of inherent inaccuracy or bias. Second, although we used a four-stage  
40  
41 stratified sampling method, sampling errors are still inevitable. Lastly, this study only  
42  
43 included the seven most common lifestyle factors.  
44  
45

### 46 47 **CONCLUSION**

48  
49 In this large representative cross-sectional study of Chinese urban residents, we found  
50  
51 that direct association of lifestyle with physical, mental, and social SHS were smaller  
52  
53 than direct association and mediating effect of health consciousness. Moreover, health  
54  
55 consciousness was more important in preventing physical, mental, and social SHS  
56  
57 than lifestyle, and might be useful in changing unhealthy lifestyle and reducing the  
58  
59  
60

1  
2  
3 influence of poor lifestyle on physical, mental, and social SHS.  
4  
5  
6

### 7 8 **Acknowledgments** 9

10 The authors thank all study participants. We also thank the investigators and students  
11  
12 for their assistance in this research.  
13  
14

### 15 16 17 **Funding** 18

19 This research was supported by the National Natural Science Fund, National Natural  
20  
21 Science Foundation of China (No: 71673126), the Science and Technology Planning  
22  
23 Project of Guangzhou City of China (No: 201803010089), and a Grant from Public  
24  
25 Health Service System Construction Research Foundation of Guangzhou  
26  
27 (2018-2020).  
28  
29  
30  
31  
32

### 33 **Role of the funding source** 34

35 The sponsors of the study had no role in the study design, data collection, data  
36  
37 analysis, or data interpretation. The corresponding author had full access to all the  
38  
39 data in the study and had final responsibility for the decision to submit for publication.  
40  
41  
42  
43

### 44 **Competing Interests** 45

46 No declared  
47  
48  
49  
50

### 51 **Author Contributions** 52

53 XJ developed the questionnaire and study design, supervised the analysis and  
54  
55 contributed to the final version of the manuscript. XYL did the analyses and wrote the  
56  
57 first draft. LGH, FYF, XMY, LYQ and JLJ were in charge of the investigation. All  
58  
59  
60

1  
2  
3 authors contributed to and read the final draft of the manuscript.  
4  
5  
6  
7

### 8 **Patient consent for publication**

9  
10 Not required  
11  
12  
13

### 14 **Ethics approval**

15  
16  
17 Ethics approval to collect the patients' data was obtained from the Ethics Committee  
18  
19 of the Nanfang Hospital of Southern Medical University (NFEC-2019-196).  
20  
21  
22

### 23 **Data availability statement**

24  
25  
26 Data are available upon reasonable request. Data are available upon reasonable  
27  
28 request. Readers can contact Xu Jun (drugstat@163.com) to submit raw data access  
29  
30 requirements.  
31  
32  
33  
34

### 35 **References**

- 36  
37  
38 1 World Health Organization: What is the WHO definition of health? World Health  
39 Organization. <http://www.who.int/suggestions/faq/en/>. Accessed 23 Mar 2020.  
40  
41 2 Strong K, Mathers C, Leeder S, *et al.* . Preventing chronic diseases: how many  
42 lives can we save? *Lancet* 2005;366:1578-82  
43  
44 3 Wang L, Kong LZ, Wu F, *et al.* . Preventing chronic diseases in China. *Lancet*  
45 2005;366:1821-4.  
46  
47 4 Transcript of press conference of the office of Health China action Promotion  
48 Committee on July 31, 2019.  
49 [http://www.nhc.gov.cn/xcs/s7847/201907/0d95adec49f84810a6d45a0a1e997d67.](http://www.nhc.gov.cn/xcs/s7847/201907/0d95adec49f84810a6d45a0a1e997d67.shtml)  
50  
51 shtml  
52  
53 5 GBD 2015 Mortality and Causes of Death Collaborators. Global, regional, and  
54 national life expectancy, all-cause mortality, and cause-specific mortality for 249  
55 causes of death, 1980-2015: a systematic analysis for the Global Burden of  
56 Disease Study 2015. *Lancet* 2016;388(10053):1459-544.  
57  
58  
59  
60

- 1  
2  
3  
4  
5  
6  
7  
8  
9  
10  
11  
12  
13  
14  
15  
16  
17  
18  
19  
20  
21  
22  
23  
24  
25  
26  
27  
28  
29  
30  
31  
32  
33  
34  
35  
36  
37  
38  
39  
40  
41  
42  
43  
44  
45  
46  
47  
48  
49  
50  
51  
52  
53  
54  
55  
56  
57  
58  
59  
60
- 6 Wang Y, Ge S, Yan Y, *et al.* . China suboptimal health cohort study: Rationale, design and baseline characteristics. *J. Transl. Med* 2016;14:291-302.
  - 7 Wang W. Suboptimal health: a potential preventive instrument for non-communicable disease control and management. *J. Transl. Med* 2012, 10(2): A45.
  - 8 Yan YX, Liu YQ, Li M, *et al.* . Development and evaluation of a questionnaire for measuring suboptimal health status in urban Chinese. *Int. J. Epidemiol* 2009;19(6):333-41.
  - 9 Yan YX, Dong J, Liu YQ, *et al.* . Association of suboptimal health status and cardiovascular risk factors in urban Chinese workers. *J Urban Health* 2012; 89(2): 329-38.
  - 10 Sun Q, Xu X, Zhang J, *et al.* . Association of suboptimal health status with intestinal microbiota in Chinese youths. *J Cell Mol Med* 2020;24(2):1837-47.
  - 11 Alzain MA, Asweto CO, Zhang J, *et al.* . Telomere Length and Accelerated Biological Aging in the China Suboptimal Health Cohort: A Case-Control Study. *OMICS* 2017;21(6):333-9.
  - 12 Yan YX, Wu LJ, Xiao HB, *et al.* . Latent class analysis to evaluate performance of plasma cortisol, plasma catecholamines, and SHSQ-25 for early recognition of suboptimal health status. *EPMA J* 2018;9(3):299-305.
  - 13 Wang H, Tian Q, Zhang J, *et al.* . Population-based case-control study revealed metabolomic biomarkers of suboptimal health status in Chinese population-potential utility for innovative approach by predictive, preventive, and personalized medicine. *EPMA J* 2020;11(2):147-60.
  - 14 Adua E, Memarian E, Russell A, *et al.* . Utilization of N-glycosylation profiles as risk stratification biomarkers for suboptimal health status and metabolic syndrome in a Ghanaian population. *Biomark Med* 2019;13(15):1273-87.
  - 15 Yan YX, Dong J, Li M, *et al.* . Establishment of cut off point for suboptimal health status using SHSQ-25. *Chinese Journal of Health Statistics* 2011;28(3): 256-8
  - 16 Xu L, Ni HM, Shen HY, *et al.* . Item selection in development of Chinese sub-health state evaluation scale. *Chinese Journal of Health Statistics* 2012;29(1):10-3.
  - 17 Xue YL, Xu J, Liu GH, *et al.* . Study of association between personality and sub-health status among urban residents aged more than 14 years old in 4 cities in

- 1  
2  
3 China. *J Southern Med Univ* 2019,39(4):443-9.  
4  
5 18 Xue YL, Xu J, Liu GH, *et al.* . The mediating effect of adversity quotient on the  
6 correlation between stressful life events and sub-health status. *Modern Preventive*  
7 *Medicine* 2019,46(1):82-5,90.  
8  
9 19 Sun X, Wei M, Zhu C, *et al.* . The epidemiological investigation of sub-health  
10 status in Guangdong. *Shandong Med J* 2008; 48:59-60  
11  
12 20 Xie J, Luo HB, Zhu H, *et al.* . Prevalence and influence factors of sub-health  
13 status among urban residents in Tianjin. *Chin J Public Health* 2016;32:76-80.  
14  
15 21 Sou J, Goldenberg S M, Duff P, *et al.* . Recent im/migration to Canada linked to  
16 unmet health needs among sex workers in Vancouver, Canada: Findings of a  
17 longitudinal study. *Issues in Health Care of Women* 2017;38(5):492-506.  
18  
19 22 Dunstan RH, Sparkes DL, Roberts TK, *et al.* . Development of a complex amino  
20 acid supplement, Fatigue Reviva, for oral ingestion: initial evaluations of product  
21 concept and impact on symptoms of suboptimal health in a group of males. *Nutr J*  
22 2013; 12:115.  
23  
24 23 Liu Z, Li M. The third state and psychosomatic medicine research. *Med*  
25 *Philosophy* 2001;22(1):36–8.  
26  
27 24 Kupaev V, Borisov O, Marutina E, *et al.* . Integration of suboptimal health status  
28 and endothelial dysfunction as a new aspect for risk evaluation of cardiovascular  
29 disease. *Epma Journal* 2016, 7(1):19.  
30  
31 25 Bi JL, Huang Y, Xiao Y, *et al.* . Association of lifestyle factors and suboptimal  
32 health status: a cross sectional study of Chinese students. *BMJ Open* 2014;4(6):  
33 e005156.  
34  
35 26 Wang W, Russell A, Yan Y. Global Health Epidemiology Reference Group  
36 (GHERG). Traditional Chinese medicine and new concepts of predictive,  
37 preventive and personalized medicine in diagnosis and treatment of suboptimal  
38 health. *EPMA J* 2014;5(1):4-12.  
39  
40 27 Wang W, Yan Y. Suboptimal health: a new health dimension for translational  
41 medicine *Clin Transl Med* 2012,14;1(1):28.  
42  
43 28 Lolokote S, Hidru TH, Li X. Do socio-cultural factors influence college students'  
44 self-rated health status and health-promoting lifestyle behaviors? A  
45 cross-sectional multicenter study in Dalian, China. *BMC Public Health* 2017; 17:  
46 478.  
47  
48  
49  
50  
51  
52  
53  
54  
55  
56  
57  
58  
59  
60

- 1  
2  
3  
4  
5  
6  
7  
8  
9  
10  
11  
12  
13  
14  
15  
16  
17  
18  
19  
20  
21  
22  
23  
24  
25  
26  
27  
28  
29  
30  
31  
32  
33  
34  
35  
36  
37  
38  
39  
40  
41  
42  
43  
44  
45  
46  
47  
48  
49  
50  
51  
52  
53  
54  
55  
56  
57  
58  
59  
60
- 29 Chen J, Xiang H, Jiang P, *et al.* . The role of healthy lifestyle behaviors in the implementation of regressing suboptimal health status among college students in China: A nested case-control study. *Int J Environ Res Public Health* 2017; 14: 240.
- 30 Ping Xie. Blue Book of Investment: Annual Report on The Development of China's Investment (2015). *Soc Science Acad Press* 2015.
- 31 Siripitayakunkit A, Hanucharurnkul S, Gail D' Eramo Melkus, *et al.* . Factors Contributing to Integrating Lifestyle in Thai Women with Type 2 Diabetes. *Thai J Nurs Res* 2008; 12 (3) 166 - 178
- 32 Barclay C, Procter KL, Glendenning R, *et al.* . Can type 2 diabetes be prevented in UK general practice? A lifestyle-change feasibility study (ISAIHA). *Br J Gen Pract* 2008; 58(553):541-7.
- 33 Alm-Roijer C, Stagmo M, Uden G, *et al.* .. Better knowledge improves adherence to lifestyle changes and medication in patients with coronary heart disease. *Eur J Cardiovasc Nurs* 2004; 3(4):321-30.
- 34 Jasmine TJX, Wai-Chi SC, Hegney DG. The impact of knowledge and beliefs on adherence to cardiac rehabilitation programs in patients with heart failure: A systematic review. *JBI Libr Syst Rev* 2012; 10(7):399-470.
- 35 Kitson A, Brook A, Harvey G, *et al.* . Using Complexity and Network Concepts to Inform Healthcare Knowledge Translation. *Int J Health Policy Manag* 2017; 7: 231.
- 36 Gazmararian JA, Williams MV, Peel J, *et al.* . Health Literacy and Knowledge of Chronic Disease. *Patient Educ Couns* 2003; 51(3):267-75.
- 37 Gould, SJ. Consumer attitudes toward health and health care: A differential perspective. *J Consum Aff* 1988; 22, 96-118.
- 38 Michaelidou, N, Hassan, LM. The role of health consciousness, food safety concern and ethical identity on attitudes and intentions towards organic food. *J Consum Stud* 2008; 32, 163-70.
- 39 Dumitrescu AL, Kawamura M, Dogaru B, *et al.* . Investigating the relationship between self-reported oral health status, oral health-related behaviours and self-consciousness in Romania. *Oral Health Prev Dent* 2008; 6(2):95.
- 40 Lu Y, Xu J, Cai YJ, *et al.* . Reliability and Validity of SHS Measurement Scale Version 1.0 for Measuring the SHS of Urban Residents in Three Districts. *Chin. J. Health Psychol* 2013;21(5):707–8.

- 1  
2  
3  
4 41 Xu J, Xue YL, Liu GH, *et al.* . Establishment of the norms of Sub-Health  
5 Measurement Scale Version 1.0 for Chinese urban residents. *J South Med Univ*  
6 2019;39(3):271-8.  
7  
8  
9 42 Chen JY, Cheng JR, Liu YY, *et al.* . Associations between breakfast eating habits  
10 and health-promoting lifestyle behaviors, suboptimal health status in Southern  
11 China: A population based, cross sectional study. *J Transl Med* 2014;12:348.  
12  
13 43 Cui ZG, Xu J, Wu WX, *et al.* . Study of status and its impacting factors of  
14 sub-health in young and middle-aged intellectuals in Guangzhou. *Chin Med*  
15 *Herald* 2015;12(30):12-6.  
16  
17  
18 44 Huang XW, Xu J, Wu WX, *et al.* . Status and Influencing Factors of Sub-health  
19 in New Generation of Chinese Migrant Workers in Pearl River Delta of  
20 China. *Chin Gen Prac* 2017;20(1): 95-103.  
21  
22  
23 45 Adua E, Roberts P, Wang W. Incorporation of suboptimal health status as a  
24 potential risk assessment for type II diabetes mellitus: a case-control study in a  
25 Ghanaian population. *EPMA J* 2017;8(4):345-55.  
26  
27  
28 46 Keski-Rahkonen A, Kaprio J, Rissanen A, *et al.* . Breakfast skipping and  
29 health-compromising behaviors in adolescents and adults. *Eur J Clin Nutr* 2003;  
30 57: 842-53.  
31  
32  
33 47 Ma C, Xu W, Zhou L, *et al.* . Association between lifestyle behaviors and  
34 suboptimal health status among Chinese college freshmen: A cross-sectional  
35 study. *BMC Public Health* 2018; 18: 105.  
36  
37  
38 48 Stea TH, Knutsen T, Torstveit MK. Association between short time in bed,  
39 health-risk behaviors and poor academic achievement among Norwegian  
40 adolescents. *Sleep Medicine* 2014; 15: 666-71.  
41  
42  
43 49 Zahra J, Ford T, Jodrell D. Cross-sectional survey of daily junk food consumption,  
44 irregular eating, mental and physical health and parenting style of British  
45 secondary school children. *Child Care Hlth Dev* 2014; 40: 481.  
46  
47  
48 50 Nielsen MB, Gjerstad J, Frone M. Alcohol use among Norwegian workers:  
49 Associations with health and well-being. *Occup Med* 2018; 68: 96-8.  
50  
51  
52 51 Steele J, Lisher J, Skivington M, *et al.* . A higher effort-based paradigm in  
53 physical activity and exercise for public health: Making the case for a greater  
54 emphasis on resistance training. *BMC Public Health* 2017; 17: 300.  
55  
56  
57 52 Zhubing S, Zhenyi W. A correlation research of university students' lifestyle  
58 behaviors and psychological sub-health in Guizhou. *J. Nanjing Univ. Nat. Sci*  
59  
60



- 2014; 13:155-60.
- 53 Hovick S, Nevarez L, Lloyd S, et al. . An examination of health consciousness and its' link to health behavior[C]// 140st APHA Annual Meeting and Exposition 2012. 2012.
- 54 Sheeran P, Maki A, Montanaro E, *et al.* . The impact of changing attitudes, norms, and self-efficacy on health-related intentions and behavior: A meta-analysis. *Pers Psychol* 2016; 66:1178-88.
- 55 Kaskutas LA, Greenfield TK. The Role of Health Consciousness in Predicting Attention to Health Warning Messages. *Am J Health Promot* 1997; 11(3):186-93.

Table 1 Participant's demographic characteristics (n=3535)

| Characteristic                            | N    | %     |
|-------------------------------------------|------|-------|
| Gender                                    |      |       |
| Man                                       | 2772 | 47.77 |
| Woman                                     | 3031 | 52.23 |
| Married status                            |      |       |
| Unmarried                                 | 1556 | 26.81 |
| Married                                   | 3829 | 65.98 |
| Divorced or widows                        | 386  | 6.65  |
| Information missing                       | 32   | 0.55  |
| Per capita monthly household income (RMB) |      |       |
| <5000                                     | 3320 | 57.21 |
| >=5000                                    | 2419 | 41.69 |
| Information missing                       | 64   | 1.10  |
| Highest education level                   |      |       |
| Compulsory school (through grade 9)       | 1343 | 23.14 |
| High school graduation                    | 1298 | 22.37 |
| Junior college degree                     | 1374 | 23.68 |
| University degree and above               | 1786 | 30.78 |
| Information missing                       | 2    | 0.03  |

Table 2 Group comparisons of lifestyle, health consciousness, and SHS

| Variates                     | N    | PS<br>Mean(SE)                     | MS<br>Mean(SE)                     | SS<br>Mean(SE)                     |
|------------------------------|------|------------------------------------|------------------------------------|------------------------------------|
| <b>Smoking</b>               |      |                                    |                                    |                                    |
| Never                        | 3987 | 71.56(12.48) <sup>#^</sup>         | 67.13(14.46) <sup>#</sup>          | 62.15(15.16) <sup>#^</sup>         |
| Quit                         | 614  | 68.32(13.49) <sup>*^\$</sup>       | 65.41(15.11) <sup>*^\$</sup>       | 58.38(17.2) <sup>*^</sup>          |
| <20 cigarettes<br>/day       | 1027 | 70.31(12.67) <sup>*#</sup>         | 67.4(14.44) <sup>#</sup>           | 60.93(15.53) <sup>*#</sup>         |
| ≥ 20 cigarettes<br>/day      | 164  | 70.85(12.90) <sup>#</sup>          | 68.26(15.44) <sup>#</sup>          | 61.02(17.86)                       |
| <b>Bad diet habits</b>       |      |                                    |                                    |                                    |
| No                           | 3357 | 73.1(12.52) <sup>#</sup>           | 70.2(14.14) <sup>#</sup>           | 64.19(14.77) <sup>#</sup>          |
| Yes                          | 2446 | 67.92(12.25) <sup>*</sup>          | 62.64(13.97) <sup>*</sup>          | 57.71(15.84) <sup>*</sup>          |
| <b>Alcohol intake</b>        |      |                                    |                                    |                                    |
| Never                        | 2077 | 71.93(13.13) <sup>#^\$&amp;</sup>  | 68.18(14.66) <sup>#^\$&amp;</sup>  | 62.61(15.78) <sup>#^&amp;</sup>    |
| Occasionally                 | 3099 | 70.86(12.06) <sup>*^\$&amp;</sup>  | 66.55(14.21) <sup>*^&amp;</sup>    | 61.15(15.11) <sup>*^&amp;</sup>    |
| Little everyday              | 421  | 68.85(13.65) <sup>*#&amp;</sup>    | 66.29(15.75) <sup>*^&amp;</sup>    | 59.93(16.69) <sup>*^&amp;</sup>    |
| Some everyday                | 106  | 68.35(12.88) <sup>*#&amp;</sup>    | 65.17(13.79) <sup>*^&amp;</sup>    | 60.27(14.29) <sup>&amp;</sup>      |
| Much everyday                | 72   | 63.47(14.37) <sup>*#^\$</sup>      | 60.1(16.45) <sup>*#^\$</sup>       | 53.97(20.69) <sup>*#^\$</sup>      |
| <b>Breakfast consumption</b> |      |                                    |                                    |                                    |
| Never                        | 139  | 67.93(15.07) <sup>\$&amp;</sup>    | 62.4(17.25) <sup>\$&amp;</sup>     | 53.46(19.83) <sup>^\$&amp;</sup>   |
| Occasionally                 | 600  | 66.88(12.63) <sup>\$&amp;</sup>    | 62.69(14.12) <sup>\$&amp;</sup>    | 55.79(16.70) <sup>\$&amp;</sup>    |
| Sometimes                    | 830  | 68.03(11.99) <sup>\$&amp;</sup>    | 61.81(13.07) <sup>\$&amp;</sup>    | 56.37(15.38) <sup>*\$&amp;</sup>   |
| Frequently                   | 1539 | 71.07(11.94) <sup>*#^&amp;</sup>   | 66.48(14.01) <sup>*#^&amp;</sup>   | 61.75(14.52) <sup>*#^&amp;</sup>   |
| Everyday                     | 2671 | 72.91(12.73) <sup>*#^\$</sup>      | 70.22(14.46) <sup>*#^\$</sup>      | 64.69(14.75) <sup>*#^\$</sup>      |
| <b>Physical exercise</b>     |      |                                    |                                    |                                    |
| Never                        | 848  | 68.55(13.27) <sup>#^\$&amp;</sup>  | 64.24(14.4) <sup>#^\$&amp;</sup>   | 58.21(15.68) <sup>#^\$&amp;</sup>  |
| Occasionally                 | 2338 | 70.43(11.78) <sup>*\$&amp;</sup>   | 65.54(13.92) <sup>*^\$&amp;</sup>  | 60.36(14.45) <sup>*^\$&amp;</sup>  |
| Sometimes                    | 1373 | 71.26(13.11) <sup>*^&amp;</sup>    | 67.54(14.53) <sup>*#^\$</sup>      | 61.51(16.75) <sup>*#^\$&amp;</sup> |
| Frequently                   | 608  | 71.77(13.03) <sup>*#&amp;</sup>    | 68.72(14.85) <sup>*#^</sup>        | 64.57(15.24) <sup>*#^&amp;</sup>   |
| Everyday                     | 627  | 74.73(12.73) <sup>*#^\$</sup>      | 73.53(14.82) <sup>*#^\$</sup>      | 67.12(15.11) <sup>*#^\$</sup>      |
| <b>Early to bed</b>          |      |                                    |                                    |                                    |
| Never                        | 947  | 70.29(12.36) <sup>\$&amp;</sup>    | 64.8(14.74) <sup>\$&amp;</sup>     | 59.72(15.61) <sup>\$&amp;</sup>    |
| Occasionally                 | 1512 | 70.3(11.94) <sup>\$&amp;</sup>     | 65.57(13.71) <sup>\$&amp;</sup>    | 60.08(15.33) <sup>\$&amp;</sup>    |
| Sometimes                    | 1224 | 70.01(12.84) <sup>\$&amp;</sup>    | 65.84(14.46) <sup>*#^\$&amp;</sup> | 60.47(15.99) <sup>\$&amp;</sup>    |
| Frequently                   | 997  | 71.49(12.76) <sup>*#^&amp;</sup>   | 68.36(14.46) <sup>*#^&amp;</sup>   | 63.07(14.79) <sup>*#^&amp;</sup>   |
| Everyday                     | 1113 | 72.98(13.39) <sup>*#^\$</sup>      | 70.99(14.84) <sup>*#^\$</sup>      | 64.52(15.49) <sup>*#^\$</sup>      |
| <b>Sleep time</b>            |      |                                    |                                    |                                    |
| <3hours/day                  | 35   | 62.96(12.11) <sup>^\$&amp;</sup>   | 58.87(13.81) <sup>^\$&amp;</sup>   | 49.68(20.42) <sup>^\$&amp;</sup>   |
| <5hours/day                  | 145  | 62.44(12.88) <sup>^\$&amp;</sup>   | 56.97(14.78) <sup>^\$&amp;</sup>   | 48.51(18.88) <sup>^\$&amp;</sup>   |
| <7hours/day                  | 1377 | 67.89(12.34) <sup>*#^\$&amp;</sup> | 64.88(14.09) <sup>*#^\$&amp;</sup> | 59.86(15.83) <sup>*#^\$&amp;</sup> |
| <9hours/day                  | 3748 | 72.47(12.29) <sup>*#^&amp;</sup>   | 68.14(14.38) <sup>*#^</sup>        | 62.65(14.82) <sup>*#^</sup>        |
| ≥9hours/day                  | 492  | 71.09(13.67) <sup>*#^\$</sup>      | 68.15(15.30) <sup>*#^</sup>        | 61.95(16.59) <sup>*#^</sup>        |
| <b>Health knowledge</b>      |      |                                    |                                    |                                    |
| Very few                     | 1332 | 70.27(12.55) <sup>\$&amp;</sup>    | 65.17(14.79) <sup>^\$&amp;</sup>   | 58.31(15.43) <sup>#^\$&amp;</sup>  |

|                                    |                |      |                    |                    |                    |
|------------------------------------|----------------|------|--------------------|--------------------|--------------------|
|                                    | Few            | 1794 | 70.38(12.51) \$&   | 65.77(14.27) ^\$&  | 60.13(15.41) *^\$& |
|                                    | General        | 1913 | 70.71(12.52) \$&   | 67.54(14.37) *#\$& | 62.55(15.13) *#\$& |
|                                    | Much           | 628  | 74.11(12.58) *#^   | 71.47(13.79) *#^&  | 67.2(14.62) *#^&   |
|                                    | Very much      | 120  | 74.65(15.97) *#^   | 75.26(15.28) *#^\$ | 70.61(18.46) *#^\$ |
| Care for health                    |                |      |                    |                    |                    |
|                                    | Very low       | 329  | 67.73(14.32) ^\$&  | 61.09(16.65) ^\$&  | 55.25(17.71) ^\$&  |
|                                    | Low            | 789  | 67.61(13.11) ^\$&  | 62.33(14.42) ^\$&  | 56.1(16.47) ^\$&   |
|                                    | General        | 2485 | 69.5(11.9) *#\$&   | 65.37(13.69) *#\$& | 59.76(14.35) *#\$& |
|                                    | High           | 1752 | 73.66(12) *#^&     | 70.3(13.74) *#^&   | 65.28(14.44) *#^&  |
|                                    | Very high      | 437  | 76.86(13.36) *#^\$ | 76.27(14.12) *#^\$ | 70.57(15.73) *#^\$ |
| Effect of leisure promoting health |                |      |                    |                    |                    |
|                                    | No effect      | 733  | 65.7(12.87) #^     | 60.94(14.56) #^    | 54.24(17.22) #^    |
|                                    | Some effect    | 3870 | 70.37(12.04) *^    | 66.1(13.76) *^     | 60.68(14.39) *^    |
|                                    | Very effective | 1163 | 76.39(12.75) *#    | 74.11(14.58) *#    | 69(15.28) *#       |

Transformed scores were analyzed here. Statistical analysis included a one-way ANOVA followed by LSD multiple comparisons test. \*:  $P < 0.05$  as compared to answer code 1; #:  $P < 0.05$  as compared to answer code 2; ^:  $P < 0.05$  as compared to answer code 3; \$:  $P < 0.05$  as compared to answer code 4, &:  $P < 0.05$  as compared to answer code 5.

Table 3 Influencing path of lifestyle and health consciousness on SHS

| SHS | Path way                                    | Mean standardized effects | 95%CI       |             | P-value |
|-----|---------------------------------------------|---------------------------|-------------|-------------|---------|
|     |                                             |                           | lower bound | upper bound |         |
| PS  |                                             |                           |             |             |         |
|     | Lifestyle—PS(total)                         | -0.329                    | -0.385      | -0.278      | <0.001  |
|     | Lifestyle—PS(direct)                        | -0.144                    | -0.209      | -0.081      | <0.001  |
|     | Lifestyle—Health consciousness—PS(indirect) | -0.185                    | -0.228      | -0.149      | <0.001  |
|     | Health consciousness—PS                     | 0.360                     | 0.295       | 0.427       | <0.001  |
| MS  |                                             |                           |             |             |         |
|     | Lifestyle—MS(total)                         | -0.370                    | -0.408      | -0.330      | <0.001  |
|     | Lifestyle—MS(direct)                        | -0.146                    | -0.201      | -0.094      | 0.001   |
|     | Lifestyle—Health consciousness—MS(indirect) | -0.224                    | -0.265      | -0.186      | <0.001  |
|     | Health consciousness—MS                     | 0.452                     | 0.392       | 0.510       | <0.001  |
| SS  |                                             |                           |             |             |         |
|     | Lifestyle—SS(total)                         | -0.345                    | -0.383      | -0.308      | <0.001  |
|     | Lifestyle—SS(direct)                        | -0.130                    | -0.181      | -0.077      | 0.001   |
|     | Lifestyle—Health consciousness—SS(indirect) | -0.216                    | -0.257      | -0.179      | <0.001  |
|     | Health consciousness—SS                     | 0.434                     | 0.376       | 0.490       | <0.001  |

PS = physical suboptimal health status, MS = mental suboptimal health status, SS = social suboptimal health status

1  
2  
3  
4  
5  
6  
7 Figure 1. SEM model of lifestyle, health consciousness and PS (Model 1), MS (Model  
8 2), or SS (Model 3). All the standardized regression coefficients are presented as  
9 single-headed arrows, and statistically significant at 0.05 significance level.  
10 Abbreviations: PS= physical sub-health status, MS=mental sub-health status,  
11 SS=social sub-health status.  
12  
13  
14  
15  
16  
17  
18  
19  
20  
21  
22  
23  
24  
25  
26  
27  
28  
29  
30  
31  
32  
33  
34  
35  
36  
37  
38  
39  
40  
41  
42  
43  
44  
45  
46  
47  
48  
49  
50  
51  
52  
53  
54  
55  
56  
57  
58  
59  
60

For peer review only

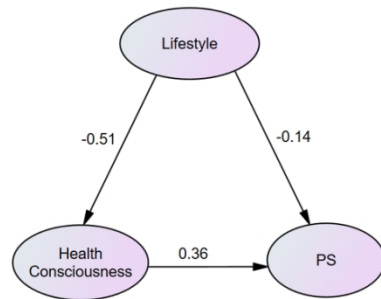

CMIN/DF=7.922, CFI=0.962,  
GFI=0.981, AGFI=0.967,  
RMSEA=0.035

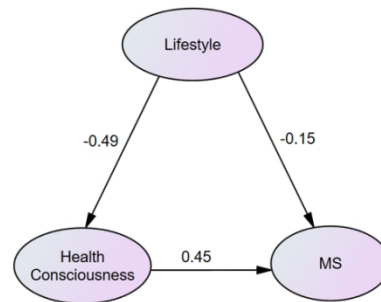

CMIN/DF=5.583, CFI=0.982,  
GFI=0.988, AGFI=0.978,  
RMSEA=0.028

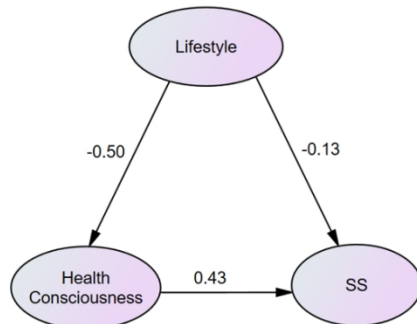

CMIN/DF=4.957, CFI=0.985,  
GFI=0.990, AGFI=0.983,  
RMSEA=0.026

**Figure 1.** SEM model of lifestyle, health consciousness and PS (Model 1), MS (Model 2), or SS (Model 3). All the standardized regression coefficients are presented as single-headed arrows, and statistically significant at 0.05 significance level. Abbreviations: PS= physical sub-health status, MS=mental sub-health status, SS=social sub-health status.

SEM model of lifestyle, health consciousness and PS (Model 1), MS (Model 2), or SS (Model 3). All the standardized regression coefficients are presented as single-headed arrows, and statistically significant at 0.05 significance level. Abbreviations: PS= physical sub-health status, MS=mental sub-health status, SS=social sub-health status.

STROBE Statement—Checklist of items that should be included in reports of *cross-sectional studies*

|                              | Item No | Recommendation                                                                                                                                                                                    | Page No        |
|------------------------------|---------|---------------------------------------------------------------------------------------------------------------------------------------------------------------------------------------------------|----------------|
| <b>Title and abstract</b>    | 1       | (a) Indicate the study's design with a commonly used term in the title or the abstract                                                                                                            | 1              |
|                              |         | (b) Provide in the abstract an informative and balanced summary of what was done and what was found                                                                                               | 2-3            |
| <b>Introduction</b>          |         |                                                                                                                                                                                                   |                |
| Background/rationale         | 2       | Explain the scientific background and rationale for the investigation being reported                                                                                                              | 4-6            |
| Objectives                   | 3       | State specific objectives, including any prespecified hypotheses                                                                                                                                  | 6              |
| <b>Methods</b>               |         |                                                                                                                                                                                                   |                |
| Study design                 | 4       | Present key elements of study design early in the paper                                                                                                                                           | 6              |
| Setting                      | 5       | Describe the setting, locations, and relevant dates, including periods of recruitment, exposure, follow-up, and data collection                                                                   | 6              |
| Participants                 | 6       | (a) Give the eligibility criteria, and the sources and methods of selection of participants                                                                                                       | 6              |
| Variables                    | 7       | Clearly define all outcomes, exposures, predictors, potential confounders, and effect modifiers. Give diagnostic criteria, if applicable                                                          | 7-9            |
| Data sources/<br>measurement | 8*      | For each variable of interest, give sources of data and details of methods of assessment (measurement). Describe comparability of assessment methods if there is more than one group              | 7-9            |
| Bias                         | 9       | Describe any efforts to address potential sources of bias                                                                                                                                         | 9              |
| Study size                   | 10      | Explain how the study size was arrived at                                                                                                                                                         | 6              |
| Quantitative variables       | 11      | Explain how quantitative variables were handled in the analyses. If applicable, describe which groupings were chosen and why                                                                      | 8-9            |
| Statistical methods          | 12      | (a) Describe all statistical methods, including those used to control for confounding                                                                                                             | 9-10           |
|                              |         | (b) Describe any methods used to examine subgroups and interactions                                                                                                                               | Not applicable |
|                              |         | (c) Explain how missing data were addressed                                                                                                                                                       | 10             |
|                              |         | (d) If applicable, describe analytical methods taking account of sampling strategy                                                                                                                | Not applicable |
|                              |         | (e) Describe any sensitivity analyses                                                                                                                                                             | Not applicable |
| <b>Results</b>               |         |                                                                                                                                                                                                   |                |
| Participants                 | 13*     | (a) Report numbers of individuals at each stage of study—eg numbers potentially eligible, examined for eligibility, confirmed eligible, included in the study, completing follow-up, and analysed | 10             |
|                              |         | (b) Give reasons for non-participation at each stage                                                                                                                                              | Not applicable |
|                              |         | (c) Consider use of a flow diagram                                                                                                                                                                | Not applicable |
| Descriptive data             | 14*     | (a) Give characteristics of study participants (eg demographic, clinical, social) and information on exposures and potential confounders                                                          | 10             |

|                          |     |                                                                                                                                                                                                              |                |
|--------------------------|-----|--------------------------------------------------------------------------------------------------------------------------------------------------------------------------------------------------------------|----------------|
|                          |     | (b) Indicate number of participants with missing data for each variable of interest                                                                                                                          | 21             |
| Outcome data             | 15* | Report numbers of outcome events or summary measures                                                                                                                                                         | 10-12          |
| Main results             | 16  | (a) Give unadjusted estimates and, if applicable, confounder-adjusted estimates and their precision (eg, 95% confidence interval). Make clear which confounders were adjusted for and why they were included | 10-12, 22-24   |
|                          |     | (b) Report category boundaries when continuous variables were categorized                                                                                                                                    | Not applicable |
|                          |     | (c) If relevant, consider translating estimates of relative risk into absolute risk for a meaningful time period                                                                                             | Not applicable |
| Other analyses           | 17  | Report other analyses done—eg analyses of subgroups and interactions, and sensitivity analyses                                                                                                               | Not applicable |
| <b>Discussion</b>        |     |                                                                                                                                                                                                              |                |
| Key results              | 18  | Summarise key results with reference to study objectives                                                                                                                                                     | 12-13          |
| Limitations              | 19  | Discuss limitations of the study, taking into account sources of potential bias or imprecision. Discuss both direction and magnitude of any potential bias                                                   | 14             |
| Interpretation           | 20  | Give a cautious overall interpretation of results considering objectives, limitations, multiplicity of analyses, results from similar studies, and other relevant evidence                                   | 12-14          |
| Generalisability         | 21  | Discuss the generalisability (external validity) of the study results                                                                                                                                        | 12-13          |
| <b>Other information</b> |     |                                                                                                                                                                                                              |                |
| Funding                  | 22  | Give the source of funding and the role of the funders for the present study and, if applicable, for the original study on which the present article is based                                                | 15             |

\*Give information separately for exposed and unexposed groups.

**Note:** An Explanation and Elaboration article discusses each checklist item and gives methodological background and published examples of transparent reporting. The STROBE checklist is best used in conjunction with this article (freely available on the Web sites of PLoS Medicine at <http://www.plosmedicine.org/>, Annals of Internal Medicine at <http://www.annals.org/>, and Epidemiology at <http://www.epidem.com/>). Information on the STROBE Initiative is available at [www.strobe-statement.org](http://www.strobe-statement.org).
